# Supplementary material for: Occurrence of Antimicrobial-Resistant Escherichia coli in Marine Mammals of the North and Baltic Seas: Sentinels for Human Health
Source: MDPI journal article supplement (doi:10.3390/antibiotics11091248), 2022-09-14
Supplement: s1 [file s1]

| ID  | Resistance | Diagnoses                                                                                                      | Overall health status | State of nutrition       | Age      | Sex    | Mercy killed | State of decomposition |
|-----|------------|----------------------------------------------------------------------------------------------------------------|-----------------------|--------------------------|----------|--------|--------------|------------------------|
| 1   | no         | unclear                                                                                                        | moderate              | good                     | adult    | male   | yes          | poor                   |
| 56  | yes        | gastritis, endoparasitosis GIT, otherwise unclear                                                              | moderate              | good                     | juvenile | female | no           | good                   |
| 79  | no         | pulmonar parasitosis                                                                                           | poor                  | poor                     | juvenile | female | yes          | moderate               |
| 80  | yes        | endoparasitosis with final septicaemia by Streptococcus phocae                                                 | poor                  | poor                     | juvenile | female | yes          | moderate               |
| 81  | no         | pulmonal parasitosis, bronchopneumonia                                                                         | poor                  | poor                     | juvenile | male   | yes          | moderate               |
| 82  | yes        | premature birth, suspicion of trauma                                                                           | moderate              | not determined - neonate | neonate  | female | no           | moderate               |
| 83  | no         | suspicion of trauma                                                                                            | moderate              | good                     | juvenile | female | no           | moderate               |
| 85  | no         | perinatal death (abandonment)                                                                                  | moderate              | good                     | neonate  | female | no           | moderate               |
| 86  | yes        | bronchopneumonia, endoparasitosis, cachexia                                                                    | poor                  | poor                     | juvenile | male   | no           | good                   |
| 92  | yes        | potential trauma/sepsis, otherwise unclear                                                                     | poor                  | moderate                 | juvenile | female | no           | fresh                  |
| 93  | no         | unclear; by-catch cannot be excluded                                                                           | moderate              | good                     | juvenile | female | no           | moderate               |
| 130 | no         | suspicion of by-catch; hepatitis, nephrosis, suspicion of septicaemia by Streptococcus dysgalactiae            | poor                  | good                     | adult    | male   | no           | moderate               |
| 131 | no         | by-catch; bronchopneumonia                                                                                     | poor                  | moderate                 | juvenile | female | no           | fresh                  |
| 132 | no         | suspicion of by-catch                                                                                          | good                  | good                     | juvenile | male   | no           | fresh                  |
| 135 | no         | by-catch; bronchopneumonia, dermatitis, panniculitis                                                           | poor                  | poor                     | juvenile | female | no           | fresh                  |
| 136 | no         | by-catch; bronchopneumonia                                                                                     | poor                  | moderate                 | adult    | male   | no           | fresh                  |
| 148 | yes        | abscess-forming lymphadenitis with final septicaemia due to Hafnia alvei                                       | poor                  | moderate                 | juvenile | female | no           | poor                   |
| 169 | no         | suspicion of septicaemia due to Streptococcus dysgalactiae and $\beta$ -haemolytic streptococci                | moderate              | good                     | juvenile | male   | no           | moderate               |
| 172 | yes        | bronchopneumonia/pleuritis with fibrosis with final sepsis by Stretococcus dysgalactiae; animal in parturition | poor                  | moderate                 | adult    | female | no           | moderate               |

|     |     |                                                                                                                                                                                                                  |          |                             |          |        |     |          |
|-----|-----|------------------------------------------------------------------------------------------------------------------------------------------------------------------------------------------------------------------|----------|-----------------------------|----------|--------|-----|----------|
| 193 | yes | suspicion of by-catch                                                                                                                                                                                            | good     | not determined<br>- neonate | neonate  | male   | no  | fresh    |
| 208 | yes | suspicion of trauma                                                                                                                                                                                              | good     | good                        | juvenile | male   | no  | fresh    |
| 210 | no  | hunted                                                                                                                                                                                                           | moderate | not indicated               | juvenile | female | yes | fresh    |
| 211 | yes | hunted                                                                                                                                                                                                           | moderate | not indicated               | juvenile | male   | yes | fresh    |
| 212 | yes | hunted                                                                                                                                                                                                           | moderate | not indicated               | juvenile | male   | yes | fresh    |
| 214 | yes | hunted                                                                                                                                                                                                           | moderate | moderate                    | adult    | female | yes | fresh    |
| 215 | yes | Septicaemia due to Enterococcus faecalis and E. coli; cachexia                                                                                                                                                   | poor     | poor                        | juvenile | female | yes | moderate |
| 216 | no  | suspicion of trauma                                                                                                                                                                                              | good     | moderate                    | juvenile | male   | no  | moderate |
| 218 | no  | suspicion of by-catch; fish remains in the stomach                                                                                                                                                               | good     | good                        | neonate  | male   | no  | moderate |
| 221 | no  | by-catch; bronchopneumonia, cholangitis and pericholangitis                                                                                                                                                      | poor     | moderate                    | adult    | male   | no  | fresh    |
| 222 | yes | by-catch; bronchopneumonia                                                                                                                                                                                       | poor     | moderate                    | adult    | male   | no  | fresh    |
| 223 | yes | Septicaemia due to Streptococcus phocae (portal of entrance head wound/dermatitis or lung/bronchopneumonia)                                                                                                      | poor     | poor                        | juvenile | male   | yes | good     |
| 226 | no  | shot (hunting quote); oligofocal, moderate, granulomatous pneumonia; erosive colitis                                                                                                                             | moderate | moderate                    | juvenile | male   | yes | fresh    |
| 227 | yes | shot (hunting quote); focal, moderate, granulomatous pneumonia; multifocal, mild to moderate peribronchial and interstitial pneumonia; moderate enteritis; focal, mild colitis; hyperplasia of lymphatic tissues | moderate | good                        | juvenile | female | yes | fresh    |
| 228 | yes | shot (hunting quote); focal granulomatous pneumonia; mild to moderate colitis; hyperplasia of lymphatic tissues                                                                                                  | moderate | good                        | adult    | male   | yes | fresh    |
| 229 | no  | shot (hunting quote); pneumonia, gastritis, colitis, hepatitis, moderate endoparasitosis                                                                                                                         | moderate | good                        | adult    | male   | yes | fresh    |

|     |     |                                                                                                                        |          |          |          |        |     |       |
|-----|-----|------------------------------------------------------------------------------------------------------------------------|----------|----------|----------|--------|-----|-------|
| 230 | no  | shot (hunting quote); enteritis; portal fibrosis of the liver; mild to moderate hepatitis; mild interstitial pneumonia | moderate | good     | adult    | female | yes | fresh |
| 231 | no  | shot (hunting quote); pneumonia, hepatitis, thyroiditis, hyperplasia of lymphatic tissues                              | moderate | good     | juvenile | female | yes | fresh |
| 232 | yes | shot (hunting quote); enteritis; hyperplasia of lymphatic tissues                                                      | moderate | good     | adult    | female | yes | fresh |
| 233 | yes | shot (hunting quote); enteritis; pneumonia, gastritis; hyperplasia of lymphatic tissues                                | moderate | good     | adult    | female | yes | fresh |
| 234 | yes | shot (hunting quote); enteritis; colitis; hyperplasia of lymphatic tissues                                             | moderate | moderate | adult    | male   | yes | fresh |
| 235 | no  | shot (hunting quote); erosive colitis; mural colitis; hepatitis; hyperplasia of lymphatic tissues                      | moderate | good     | juvenile | female | yes | fresh |

Table S5: Main diagnoses and general information. The table lists the sample IDs, if antimicrobial-resistant E. coli were isolated from the sample, the main diagnoses, a classification of the overall health status per animal, the state of nutrition, the age, the sex, if the animal was mercy killed or died on its own, and the state of decomposition.
