# Supplementary material for: Occurrence of Antimicrobial-Resistant Escherichia coli in Marine Mammals of the North and Baltic Seas: Sentinels for Human Health
Source: MDPI journal article supplement (doi:10.3390/antibiotics11091248), 2022-09-14
Supplement: s1 [file s1]

| ID | Species                                       | Location          | Sea | Sampling date | Sample method  | Age class | Sex  | Necropsy |
|----|-----------------------------------------------|-------------------|-----|---------------|----------------|-----------|------|----------|
| 1  | Harbour seal ( <i>Phoca vitulina</i> )        | Sylt, DE          | NS  | 31.03.2017    | rectal - death | adult     | m    | yes      |
| 2  | Grey seal ( <i>Halichoerus grypus</i> )       | Helgoland, DE     | NS  | 30.03.2017    | faecal - alive | n.d.      | n.d. | no       |
| 3  | Grey seal ( <i>Halichoerus grypus</i> )       | Helgoland, DE     | NS  | 30.03.2017    | faecal - alive | n.d.      | n.d. | no       |
| 4  | Grey seal ( <i>Halichoerus grypus</i> )       | Helgoland, DE     | NS  | 30.03.2017    | faecal - alive | n.d.      | n.d. | no       |
| 5  | Grey seal ( <i>Halichoerus grypus</i> )       | Helgoland, DE     | NS  | 30.03.2017    | faecal - alive | n.d.      | n.d. | no       |
| 6  | Grey seal ( <i>Halichoerus grypus</i> )       | Helgoland, DE     | NS  | 30.03.2017    | faecal - alive | n.d.      | n.d. | no       |
| 7  | Grey seal ( <i>Halichoerus grypus</i> )       | Helgoland, DE     | NS  | 30.03.2017    | faecal - alive | n.d.      | n.d. | no       |
| 8  | Harbour seal ( <i>Phoca vitulina</i> )        | Husum, DE         | NS  | 19.04.2017    | rectal - alive | adult     | f    | no       |
| 9  | Harbour seal ( <i>Phoca vitulina</i> )        | Husum, DE         | NS  | 19.04.2017    | rectal - alive | adult     | f    | no       |
| 10 | Harbour seal ( <i>Phoca vitulina</i> )        | Husum, DE         | NS  | 19.04.2017    | rectal - alive | adult     | m    | no       |
| 11 | Harbour seal ( <i>Phoca vitulina</i> )        | Husum, DE         | NS  | 19.04.2017    | rectal - alive | adult     | m    | no       |
| 12 | Harbour seal ( <i>Phoca vitulina</i> )        | Husum, DE         | NS  | 19.04.2017    | rectal - alive | adult     | f    | no       |
| 13 | Harbour seal ( <i>Phoca vitulina</i> )        | Husum, DE         | NS  | 19.04.2017    | rectal - alive | adult     | m    | no       |
| 14 | Harbour seal ( <i>Phoca vitulina</i> )        | Husum, DE         | NS  | 19.04.2017    | rectal - alive | adult     | m    | no       |
| 15 | Harbour seal ( <i>Phoca vitulina</i> )        | Husum, DE         | NS  | 19.04.2017    | rectal - alive | adult     | m    | no       |
| 16 | Harbour seal ( <i>Phoca vitulina</i> )        | Husum, DE         | NS  | 19.04.2017    | rectal - alive | adult     | m    | no       |
| 17 | Harbour seal ( <i>Phoca vitulina</i> )        | Husum, DE         | NS  | 19.04.2017    | rectal - alive | adult     | m    | no       |
| 18 | Harbour seal ( <i>Phoca vitulina</i> )        | Husum, DE         | NS  | 19.04.2017    | rectal - alive | adult     | f    | no       |
| 19 | Harbour seal ( <i>Phoca vitulina</i> )        | Husum, DE         | NS  | 19.04.2017    | rectal - alive | adult     | f    | no       |
| 20 | Harbour seal ( <i>Phoca vitulina</i> )        | Husum, DE         | NS  | 19.04.2017    | rectal - alive | adult     | m    | no       |
| 21 | Harbour seal ( <i>Phoca vitulina</i> )        | Husum, DE         | NS  | 19.04.2017    | rectal - alive | adult     | m    | no       |
| 22 | Harbour seal ( <i>Phoca vitulina</i> )        | Husum, DE         | NS  | 19.04.2017    | rectal - alive | adult     | m    | no       |
| 23 | Harbour seal ( <i>Phoca vitulina</i> )        | Bay of Lübeck, DE | BS  | 28.05.2017    | rectal - death | juvenile  | m    | yes      |
| 24 | Harbour seal ( <i>Phoca vitulina</i> )        | Sylt, DE          | NS  | 18.04.2017    | rectal - death | juvenile  | f    | yes      |
| 25 | Harbour seal ( <i>Phoca vitulina</i> )        | Sylt, DE          | NS  | 24.04.2017    | rectal - death | juvenile  | f    | yes      |
| 26 | Harbour seal ( <i>Phoca vitulina</i> )        | Sylt, DE          | NS  | 07.05.2017    | rectal - death | juvenile  | m    | yes      |
| 27 | Harbour seal ( <i>Phoca vitulina</i> )        | Sylt, DE          | NS  | 14.05.2017    | rectal - death | juvenile  | f    | yes      |
| 28 | Grey seal ( <i>Halichoerus grypus</i> )       | Sylt, DE          | NS  | 20.05.2017    | rectal - death | juvenile  | f    | yes      |
| 29 | Harbour porpoise ( <i>Phocoena phocoena</i> ) | Sylt, DE          | NS  | 10.06.2017    | rectal - death | neonate   | f    | yes      |

|    |                                               |                        |    |            |                 |          |      |     |
|----|-----------------------------------------------|------------------------|----|------------|-----------------|----------|------|-----|
| 30 | Harbour porpoise ( <i>Phocoena phocoena</i> ) | Sylt, DE               | NS | 10.06.2017 | rectal - death  | juvenile | m    | yes |
| 31 | Harbour seal ( <i>Phoca vitulina</i> )        | Eider Barrage, DE      | NS | 16.06.2017 | rectal - death  | neonate  | f    | yes |
| 32 | Harbour porpoise ( <i>Phocoena phocoena</i> ) | Bay of Lübeck, DE      | BS | 28.06.2017 | rectal - death  | juvenile | f    | yes |
| 33 | Harbour porpoise ( <i>Phocoena phocoena</i> ) | Bay of Kiel, DE        | BS | 20.05.2017 | rectal - death  | adult    | m    | yes |
| 34 | Harbour porpoise ( <i>Phocoena phocoena</i> ) | Bay of Kiel, DE        | BS | 05.08.2017 | rectal - death  | juvenile | f    | yes |
| 35 | Harbour porpoise ( <i>Phocoena phocoena</i> ) | Bay of Kiel, DE        | BS | 29.08.2017 | rectal - death  | juvenile | m    | yes |
| 36 | Harbour porpoise ( <i>Phocoena phocoena</i> ) | Bay of Kiel, DE        | BS | 04.11.2017 | rectal - death  | juvenile | f    | yes |
| 37 | Harbour porpoise ( <i>Phocoena phocoena</i> ) | Bay of Kiel, DE        | BS | 16.11.2017 | rectal - death  | adult    | m    | yes |
| 38 | Grey seal ( <i>Halichoerus grypus</i> )       | Bay of Lübeck, DE      | BS | 12.01.2018 | faecal - alive  | adult    | n.d. | no  |
| 39 | Ringed seal ( <i>Pusa hispida</i> )           | Bay of Lübeck, DE      | BS | 22.01.2018 | rectal - death  | juvenile | f    | yes |
| 40 | Grey seal ( <i>Halichoerus grypus</i> )       | Bay of Lübeck, DE      | BS | 28.05.2018 | rectal - death  | juvenile | m    | yes |
| 41 | Harbour porpoise ( <i>Phocoena phocoena</i> ) | Kattegat, DK           | BS | 23.05.2018 | rectal - alive  | juvenile | m    | no  |
| 42 | Harbour porpoise ( <i>Phocoena phocoena</i> ) | Kattegat, DK           | BS | 23.05.2018 | rectal - alive  | juvenile | m    | no  |
| 43 | Harbour porpoise ( <i>Phocoena phocoena</i> ) | Bay of Lübeck, DE      | BS | 24.05.2018 | rectal - death  | adult    | f    | yes |
| 44 | Harbour porpoise ( <i>Phocoena phocoena</i> ) | Bay of Kiel, DE        | BS | 02.08.2018 | rectal - death  | neonate  | m    | yes |
| 45 | Ringed seal ( <i>Pusa hispida</i> )           | Bay of Kiel, DE        | BS | 02.09.2018 | rectal - death  | juvenile | m    | yes |
| 46 | Ringed seal ( <i>Pusa hispida</i> )           | Bothnian Bay, SE       | BS | 12.06.2018 | rectal - hunted | juvenile | f    | yes |
| 47 | Ringed seal ( <i>Pusa hispida</i> )           | Bothnian Bay, SE       | BS | 13.06.2018 | rectal - hunted | juvenile | m    | yes |
| 48 | Ringed seal ( <i>Pusa hispida</i> )           | Bothnian Bay, SE       | BS | 14.06.2018 | rectal - hunted | juvenile | m    | yes |
| 49 | Ringed seal ( <i>Pusa hispida</i> )           | Bothnian Bay, SE       | BS | 14.06.2018 | rectal - hunted | adult    | f    | yes |
| 50 | Harbour seal ( <i>Phoca vitulina</i> )        | Bay of Kiel, DE        | BS | 23.08.2018 | rectal - death  | juvenile | f    | yes |
| 51 | Harbour porpoise ( <i>Phocoena phocoena</i> ) | Bay of Kiel, DE        | BS | 20.08.2018 | rectal - death  | neonate  | m    | yes |
| 52 | Harbour porpoise ( <i>Phocoena phocoena</i> ) | Bay of Lübeck, DE      | BS | 03.08.2018 | rectal - death  | neonate  | m    | yes |
| 53 | Harbour porpoise ( <i>Phocoena phocoena</i> ) | Bay of Lübeck, DE      | BS | 17.11.2018 | rectal - death  | adult    | m    | yes |
| 54 | Harbour porpoise ( <i>Phocoena phocoena</i> ) | Bay of Lübeck, DE      | BS | 01.12.2018 | rectal - death  | adult    | m    | yes |
| 55 | Harbour seal ( <i>Phoca vitulina</i> )        | Bay of Mecklenburg, DE | BS | 01.11.2018 | rectal - death  | juvenile | m    | yes |
| 56 | Grey seal ( <i>Halichoerus grypus</i> )       | Bay of Lübeck, DE      | BS | 10.01.2019 | faecal - alive  | n.d.     | n.d. | no  |
| 57 | Ringed seal ( <i>Pusa hispida</i> )           | Bothnian Bay, SE       | BS | 04.06.2019 | rectal - hunted | juvenile | m    | yes |
| 58 | Ringed seal ( <i>Pusa hispida</i> )           | Bothnian Bay, SE       | BS | 05.06.2019 | rectal - hunted | juvenile | f    | yes |
| 59 | Ringed seal ( <i>Pusa hispida</i> )           | Bothnian Bay, SE       | BS | 05.06.2019 | rectal - hunted | adult    | m    | yes |
| 60 | Ringed seal ( <i>Pusa hispida</i> )           | Bothnian Bay, SE       | BS | 05.06.2019 | rectal - hunted | adult    | m    | yes |

|    |                                                 |                        |    |            |                 |          |      |     |
|----|-------------------------------------------------|------------------------|----|------------|-----------------|----------|------|-----|
| 61 | Ringed seal ( <i>Pusa hispida</i> )             | Bothnian Bay, SE       | BS | 06.06.2019 | rectal - hunted | adult    | f    | yes |
| 62 | Ringed seal ( <i>Pusa hispida</i> )             | Bothnian Bay, SE       | BS | 07.06.2019 | rectal - hunted | juvenile | f    | yes |
| 63 | Ringed seal ( <i>Pusa hispida</i> )             | Bothnian Bay, SE       | BS | 07.06.2019 | rectal - hunted | adult    | f    | yes |
| 64 | Ringed seal ( <i>Pusa hispida</i> )             | Bothnian Bay, SE       | BS | 07.06.2019 | rectal - hunted | adult    | f    | yes |
| 65 | Ringed seal ( <i>Pusa hispida</i> )             | Bothnian Bay, SE       | BS | 07.06.2019 | rectal - hunted | adult    | m    | yes |
| 66 | Ringed seal ( <i>Pusa hispida</i> )             | Bothnian Bay, SE       | BS | 08.06.2019 | rectal - hunted | juvenile | f    | yes |
| 67 | Atlantic herring ( <i>Clupea harengus</i> )     | Bay of Mecklenburg, DE | BS | 26.11.2017 | rectal - death  | n.d.     | f    | no  |
| 68 | Atlantic herring ( <i>Clupea harengus</i> )     | Bay of Mecklenburg, DE | BS | 26.11.2017 | rectal - death  | n.d.     | m    | no  |
| 69 | Plaice ( <i>Pleuronectes platessa</i> )         | Bay of Mecklenburg, DE | BS | 26.11.2017 | rectal - death  | n.d.     | f    | no  |
| 70 | Plaice ( <i>Pleuronectes platessa</i> )         | Bay of Mecklenburg, DE | BS | 26.11.2017 | rectal - death  | n.d.     | m    | no  |
| 71 | Atlantic cod ( <i>Gadus morhua</i> )            | Bay of Mecklenburg, DE | BS | 26.11.2017 | rectal - death  | n.d.     | n.d. | no  |
| 72 | Atlantic cod ( <i>Gadus morhua</i> )            | Bay of Mecklenburg, DE | BS | 26.11.2017 | rectal - death  | n.d.     | n.d. | no  |
| 73 | Atlantic cod ( <i>Gadus morhua</i> )            | Bay of Mecklenburg, DE | BS | 26.11.2017 | rectal - death  | n.d.     | n.d. | no  |
| 74 | Common dab ( <i>Limanda limanda</i> )           | Bay of Kiel, DE        | BS | 02.03.2018 | rectal - death  | n.d.     | f    | no  |
| 75 | Common dab ( <i>Limanda limanda</i> )           | Bay of Kiel, DE        | BS | 02.03.2018 | rectal - death  | n.d.     | f    | no  |
| 76 | Common dab ( <i>Limanda limanda</i> )           | Bay of Kiel, DE        | BS | 02.03.2018 | rectal - death  | n.d.     | f    | no  |
| 77 | Common dab ( <i>Limanda limanda</i> )           | Bay of Kiel, DE        | BS | 02.03.2018 | rectal - death  | n.d.     | f    | no  |
| 78 | Common dab ( <i>Limanda limanda</i> )           | Bay of Kiel, DE        | BS | 02.03.2018 | rectal - death  | n.d.     | f    | no  |
| 79 | Common dab ( <i>Limanda limanda</i> )           | Bay of Kiel, DE        | BS | 02.03.2018 | rectal - death  | n.d.     | f    | no  |
| 80 | Common dab ( <i>Limanda limanda</i> )           | Bay of Kiel, DE        | BS | 02.03.2018 | rectal - death  | n.d.     | f    | no  |
| 81 | European flounder ( <i>Platichthys flesus</i> ) | Bay of Kiel, DE        | BS | 02.03.2018 | rectal - death  | n.d.     | f    | no  |
| 82 | European flounder ( <i>Platichthys flesus</i> ) | Bay of Kiel, DE        | BS | 02.03.2018 | rectal - death  | n.d.     | m    | no  |
| 83 | European flounder ( <i>Platichthys flesus</i> ) | Bay of Kiel, DE        | BS | 02.03.2018 | rectal - death  | n.d.     | m    | no  |
| 84 | Plaice ( <i>Pleuronectes platessa</i> )         | Bay of Kiel, DE        | BS | 02.03.2018 | rectal - death  | n.d.     | f    | no  |
| 85 | Plaice ( <i>Pleuronectes platessa</i> )         | Bay of Kiel, DE        | BS | 02.03.2018 | rectal - death  | n.d.     | f    | no  |
| 86 | Plaice ( <i>Pleuronectes platessa</i> )         | Bay of Kiel, DE        | BS | 02.03.2018 | rectal - death  | n.d.     | m    | no  |
| 87 | Atlantic mackerel ( <i>Scomber scombrus</i> )   | German waddensea       | NS | 20.07.2018 | rectal - death  | n.d.     | n.d. | no  |
| 88 | Atlantic mackerel ( <i>Scomber scombrus</i> )   | German waddensea       | NS | 20.07.2018 | rectal - death  | n.d.     | n.d. | no  |
| 89 | Atlantic mackerel ( <i>Scomber scombrus</i> )   | German waddensea       | NS | 20.07.2018 | rectal - death  | n.d.     | n.d. | no  |
| 90 | Atlantic mackerel ( <i>Scomber scombrus</i> )   | German waddensea       | NS | 20.07.2018 | rectal - death  | n.d.     | n.d. | no  |

|     |                                                   |                  |    |            |                |      |      |    |
|-----|---------------------------------------------------|------------------|----|------------|----------------|------|------|----|
| 91  | Atlantic mackerel ( <i>Scomber scombrus</i> )     | German waddensea | NS | 20.07.2018 | rectal - death | n.d. | n.d. | no |
| 92  | European smelt ( <i>Osmerus eperlanus</i> )       | German waddensea | NS | 16.08.2018 | rectal - death | n.d. | n.d. | no |
| 93  | European smelt ( <i>Osmerus eperlanus</i> )       | German waddensea | NS | 16.08.2018 | rectal - death | n.d. | n.d. | no |
| 94  | European smelt ( <i>Osmerus eperlanus</i> )       | German waddensea | NS | 16.08.2018 | rectal - death | n.d. | n.d. | no |
| 95  | European smelt ( <i>Osmerus eperlanus</i> )       | German waddensea | NS | 16.08.2018 | rectal - death | n.d. | n.d. | no |
| 96  | Plaice ( <i>Pleuronectes platessa</i> )           | German waddensea | NS | 16.08.2018 | rectal - death | n.d. | n.d. | no |
| 97  | Plaice ( <i>Pleuronectes platessa</i> )           | German waddensea | NS | 16.08.2018 | rectal - death | n.d. | n.d. | no |
| 98  | Solenette ( <i>Buglossidium luteum</i> )          | German waddensea | NS | 16.08.2018 | rectal - death | n.d. | n.d. | no |
| 99  | European Sea Sturgeon ( <i>Acipenser sturio</i> ) | German waddensea | NS | 26.09.2018 | rectal - death | n.d. | n.d. | no |
| 100 | Common dab ( <i>Limanda limanda</i> )             | North Sea        | NS | 09.07.2019 | rectal - death | n.d. | f    | no |
| 101 | Common dab ( <i>Limanda limanda</i> )             | North Sea        | NS | 09.07.2019 | rectal - death | n.d. | m    | no |
| 102 | Grey gurnard ( <i>Eutrigla gurnardus</i> )        | North Sea        | NS | 10.07.2019 | rectal - death | n.d. | n.d. | no |
| 103 | Atlantic herring ( <i>Clupea harengus</i> )       | North Sea        | NS | 12.07.2019 | rectal - death | n.d. | n.d. | no |
| 104 | Atlantic mackerel ( <i>Scomber scombrus</i> )     | North Sea        | NS | 13.07.2019 | rectal - death | n.d. | n.d. | no |
| 105 | European pilchard ( <i>Sardina pilchardus</i> )   | North Sea        | NS | 13.07.2019 | rectal - death | n.d. | n.d. | no |
| 106 | Whiting ( <i>Merlangius merlangus</i> )           | North Sea        | NS | 15.07.2019 | rectal - death | n.d. | n.d. | no |

Table S1: Samples information. Listed are information for each sample including sample ID, species, sample location and sea (NS = North Sea, BS = Baltic Sea), sample method, age class, sex (m = male, f = female) and if a necropsy was performed.
