# Supplementary material for: Occurrence of Antimicrobial-Resistant Escherichia coli in Marine Mammals of the North and Baltic Seas: Sentinels for Human Health
Source: MDPI journal article supplement (doi:10.3390/antibiotics11091248), 2022-09-14
Supplement: s1 [file s1]

| Sample ID | Grwoth on AB plate | No. of AB plates with bacterial growth | Ampicillin | Cephalothin | Chloramphenicol | Ciprofloxacin | Colistin | Gentamycin | Sulfasoxazole | Tetracycline | E. coli isolated |
|-----------|--------------------|----------------------------------------|------------|-------------|-----------------|---------------|----------|------------|---------------|--------------|------------------|
| 1         | no                 | 0                                      | no         | no          | no              | no            | no       | no         | no            | no           | x                |
| 2         | yes                | 1                                      | no         | no          | yes             | no            | no       | no         | no            | no           | no               |
| 3         | yes                | 1                                      | no         | no          | yes             | no            | no       | no         | no            | no           | no               |
| 4         | yes                | 2                                      | no         | yes         | yes             | no            | no       | no         | no            | no           | no               |
| 5         | yes                | 3                                      | no         | yes         | yes             | no            | no       | yes        | no            | no           | yes              |
| 6         | yes                | 2                                      | no         | yes         | no              | no            | yes      | no         | no            | no           | yes              |
| 7         | yes                | 1                                      | no         | no          | no              | no            | yes      | no         | no            | no           | yes              |
| 8         | yes                | 4                                      | yes        | yes         | yes             | no            | no       | no         | yes           | no           | no               |
| 9         | yes                | 4                                      | yes        | yes         | no              | no            | yes      | no         | yes           | no           | yes              |
| 10        | yes                | 1                                      | no         | no          | no              | no            | yes      | no         | no            | no           | yes              |
| 11        | yes                | 2                                      | no         | yes         | yes             | no            | no       | no         | no            | no           | no               |
| 12        | yes                | 4                                      | no         | yes         | yes             | no            | yes      | no         | yes           | no           | yes              |
| 13        | yes                | 1                                      | no         | no          | no              | no            | no       | no         | yes           | no           | no               |
| 14        | yes                | 1                                      | yes        | no          | no              | no            | no       | no         | no            | no           | no               |
| 15        | no                 | 0                                      | no         | no          | no              | no            | no       | no         | no            | no           | x                |
| 16        | yes                | 4                                      | no         | yes         | yes             | no            | yes      | no         | yes           | no           | no               |
| 17        | no                 | 0                                      | no         | no          | no              | no            | no       | no         | no            | no           | x                |
| 18        | yes                | 5                                      | no         | yes         | yes             | yes           | yes      | no         | yes           | no           | no               |
| 19        | yes                | 6                                      | yes        | yes         | yes             | yes           | yes      | no         | yes           | no           | no               |
| 21        | yes                | 4                                      | no         | yes         | yes             | no            | yes      | no         | yes           | no           | no               |
| 22        | yes                | 2                                      | no         | no          | no              | no            | yes      | no         | yes           | no           | yes              |
| 23        | yes                | 3                                      | no         | yes         | yes             | no            | no       | no         | yes           | no           | no               |
| 24        | yes                | 1                                      | no         | no          | yes             | no            | no       | no         | no            | no           | yes              |
| 20        | yes                | 1                                      | no         | no          | no              | no            | yes      | no         | no            | no           | no               |

[illegible]

|    |     |   |     |     |     |     |     |     |     |     |     |
|----|-----|---|-----|-----|-----|-----|-----|-----|-----|-----|-----|
| 55 | no  | 0 | no  | x   |
| 56 | yes | 4 | yes | yes | no  | yes | yes | no  | no  | no  | no  |
| 57 | no  | 0 | no  | x   |
| 58 | no  | 0 | no  | x   |
| 59 | no  | 0 | no  | x   |
| 60 | yes | 5 | yes | yes | yes | no  | yes | no  | no  | yes | no  |
| 61 | yes | 5 | yes | yes | no  | no  | yes | no  | yes | yes | no  |
| 62 | yes | 1 | no  | yes | no  |
| 63 | yes | 6 | yes | yes | yes | no  | yes | no  | yes | yes | yes |
| 64 | no  | 0 | no  | x   |
| 65 | no  | 0 | no  | x   |
| 66 | no  | 0 | no  | x   |
| 67 | no  | 0 | no  | x   |
| 68 | no  | 0 | no  | x   |
| 69 | yes | 7 | yes | yes | yes | yes | yes | no  | yes | yes | yes |
| 70 | yes | 6 | yes | yes | yes | yes | yes | no  | yes | no  | no  |
| 71 | yes | 6 | yes | yes | yes | yes | yes | no  | yes | no  | no  |
| 72 | yes | 5 | yes | yes | no  | yes | yes | no  | yes | no  | no  |
| 73 | yes | 5 | yes | yes | yes | no  | yes | no  | yes | no  | no  |
| 76 | yes | 3 | no  | yes | no  | no  | yes | no  | yes | no  | no  |
| 77 | yes | 3 | yes | yes | no  | no  | yes | no  | no  | no  | no  |
| 78 | yes | 6 | yes | yes | yes | yes | yes | no  | yes | no  | no  |
| 74 | yes | 6 | yes | yes | yes | no  | yes | yes | yes | no  | yes |
| 75 | yes | 1 | no  | no  | no  | no  | yes | no  | no  | no  | no  |
| 79 | yes | 3 | no  | no  | yes | no  | no  | yes | yes | no  | no  |
| 80 | yes | 4 | no  | yes | yes | no  | yes | yes | no  | no  | yes |
| 81 | yes | 6 | yes | yes | yes | no  | yes | yes | yes | no  | yes |
| 82 | yes | 4 | no  | yes | no  | no  | yes | yes | yes | no  | yes |
| 83 | yes | 7 | yes | yes | yes | no  | yes | yes | yes | yes | yes |
| 84 | yes | 7 | yes | yes | yes | yes | yes | no  | yes | yes | no  |

|     |     |   |     |     |     |     |     |     |     |     |     |
|-----|-----|---|-----|-----|-----|-----|-----|-----|-----|-----|-----|
| 85  | yes | 7 | yes | yes | yes | yes | yes | no  | yes | yes | no  |
| 86  | yes | 6 | yes | yes | yes | yes | yes | no  | no  | yes | no  |
| 87  | yes | 8 | yes |
| 88  | yes | 6 | yes | yes | yes | no  | yes | no  | yes | yes | yes |
| 89  | yes | 6 | yes | yes | yes | no  | yes | yes | no  | yes | no  |
| 90  | no  | 0 | no  |
| 91  | yes | 3 | no  | yes | yes | no  | yes | no  | no  | no  | yes |
| 92  | yes | 1 | no  | no  | no  | no  | yes | no  | no  | no  | yes |
| 93  | no  | 0 | no  | x   |
| 94  | yes | 2 | no  | no  | yes | no  | yes | no  | no  | no  | no  |
| 95  | yes | 3 | yes | yes | no  | no  | yes | no  | no  | no  | no  |
| 96  | yes | 2 | no  | yes | no  | no  | yes | no  | no  | no  | yes |
| 97  | yes | 3 | yes | yes | no  | no  | yes | no  | no  | no  | no  |
| 98  | yes | 4 | yes | yes | no  | no  | yes | no  | no  | yes | yes |
| 99  | yes | 2 | yes | no  | no  | no  | yes | no  | no  | no  | no  |
| 100 | yes | 2 | no  | yes | yes | no  | no  | no  | no  | no  | no  |
| 101 | yes | 4 | yes | yes | yes | no  | yes | no  | no  | no  | no  |
| 102 | no  | 0 | no  | x   |
| 103 | yes | 3 | yes | yes | yes | no  | no  | no  | no  | no  | no  |
| 104 | no  | 0 | no  | x   |
| 105 | yes | 5 | yes | yes | yes | yes | yes | no  | no  | no  | no  |
| 106 | no  | 0 | no  | x   |

Table S2: The table shows all marine mammal and fish samples and which sample grew on which antibiotic containing plate as well if *E. coli* was isolated from at least one of the plates. No *E. coli* isolation was performed in table cells with x because of missing bacterial growth on all antibiotic containing agar plates. All samples showed bacterial growth either on Blood agar, Gassner agar or in the Mossel bouillon indicating bacterial presence in the samples.
