# Supplementary material for: Occurrence of Antimicrobial-Resistant Escherichia coli in Marine Mammals of the North and Baltic Seas: Sentinels for Human Health
Source: MDPI journal article supplement (doi:10.3390/antibiotics11091248), 2022-09-14
Supplement: s1 [file s1]

| ID | Species | Resistance | Date of necropsy | Frozen | Main macroscopic findings                                                                                                                                                                                                                         | Parasitic burden                                                                            | Microbiology                                                                                                                                                                                                                                                                                                                                                                                                                                                                                                                                                                                                                                                                                                                                                                                                                                                                                                                                                                                                                                                                                                                                                                                                   |
|----|---------|------------|------------------|--------|---------------------------------------------------------------------------------------------------------------------------------------------------------------------------------------------------------------------------------------------------|---------------------------------------------------------------------------------------------|----------------------------------------------------------------------------------------------------------------------------------------------------------------------------------------------------------------------------------------------------------------------------------------------------------------------------------------------------------------------------------------------------------------------------------------------------------------------------------------------------------------------------------------------------------------------------------------------------------------------------------------------------------------------------------------------------------------------------------------------------------------------------------------------------------------------------------------------------------------------------------------------------------------------------------------------------------------------------------------------------------------------------------------------------------------------------------------------------------------------------------------------------------------------------------------------------------------|
| 1  | Pv      | no         | 08.05.2017       | yes    | mild, acute, diffuse, alveolar bronchopneumonia; mild, chronic, focal, pyogranulomatous glossitis; mild, chronic, oligofocal, ulcerative gastritis; mild, acute, diffuse, interstitial lung emphysema; severe acute, diffuse, alveolar lung edema | stomach: mild infection; intestine: moderate infestation                                    | not determined                                                                                                                                                                                                                                                                                                                                                                                                                                                                                                                                                                                                                                                                                                                                                                                                                                                                                                                                                                                                                                                                                                                                                                                                 |
| 56 | Pv      | yes        | 13.07.2017       | yes    | severe bronchopneumonia; moderate, acute, diffuse, alveolar oedema; suspicion of septicemia                                                                                                                                                       | stomach: mild infection; small intestine: mild infection; large intestine: severe infection | lung: ++ coryneform bacteria, <i>Enterococcus faecalis</i> , non-fermenter; + <i>E. coli</i> , <i>Proteus</i> sp., yeasts; lung lymph node: ++ <i>Enterococcus faecalis</i> ; + <i>E. coli</i> , a-haemolytic streptococci, non-fermenter, <i>Proteus</i> sp., yeasts, <i>Streptococcus dysgalactiae</i> ; spleen: ++ <i>Acinetobacter</i> sp., non-fermenter; + <i>E. coli</i> , coryneform bacteria, <i>Enterococcus faecalis</i> , <i>Proteus</i> sp.; liver: ++ <i>Acinetobacter</i> sp., non-fermenter; + <i>Proteus</i> sp., <i>E. coli</i> , <i>Enterococcus faecalis</i> , yeasts, a-haemolytic streptococci; kidney: ++ <i>E. coli</i> , <i>Enterococcus faecalis</i> ; + <i>Proteus</i> sp., <i>Enterococcus faecalis</i> , a-haemolytic streptococci, yeasts; intestine: + yeasts; mesenteric lymph node: + <i>E. coli</i> , yeasts; uterus: ++ <i>Enterococcus</i> sp.; + <i>E. coli</i> ; <i>Pseudomonas</i> sp., <i>Proteus</i> sp., <i>Lactobacillus curvatus</i> ; yeasts, <i>Streptococcus dysgalactiae</i> ; brain: ++ <i>Enterococcus aquimarinus</i> ; + a-haemolytic streptococci, <i>Acinetobacter lwoffii</i> , <i>Proteus</i> sp., <i>Bacillus</i> sp., <i>E. coli</i> , non-fermenter |

|    |    |     |            |     |                                                                                                                                                                                                                                                                                                               |                                                                                                                                                                                         |                                                                                                                                                                                                                                                                                                                                                                                                                                                                                                                                                                                                                                                                                                                                                                                                                                                                                                                                                                                       |
|----|----|-----|------------|-----|---------------------------------------------------------------------------------------------------------------------------------------------------------------------------------------------------------------------------------------------------------------------------------------------------------------|-----------------------------------------------------------------------------------------------------------------------------------------------------------------------------------------|---------------------------------------------------------------------------------------------------------------------------------------------------------------------------------------------------------------------------------------------------------------------------------------------------------------------------------------------------------------------------------------------------------------------------------------------------------------------------------------------------------------------------------------------------------------------------------------------------------------------------------------------------------------------------------------------------------------------------------------------------------------------------------------------------------------------------------------------------------------------------------------------------------------------------------------------------------------------------------------|
| 79 | Pv | no  | 03.08.2017 | yes | cachexia; icterus; moderate, subacute to chronic, diffuse, fibrinous-granulomatous bronchopneumonia; fatty liver; mild, diffuse, follicular hyperplasia of the spleen; severe, acute, diffuse alveolar and interstitial lung oedema; moderate, diffuse, acute, alveolar and interstitial lung oedema          | lung: severe infection in bronchi and blood vessels; heart: mild infection in both ventricles; stomach: mild infection; intestine: mild infection in the small intestine and the caecum | lung: ++ <i>Proteus</i> sp., <i>Pseudomonas fulva</i> , <i>Enterococcus faecalis</i> , <i>Vagococcus fluvialis</i> , <i>Bacillus</i> sp.; + <i>E. coli</i> , a-haemolytic streptococci, yeasts; kidney: ++ <i>Proteus</i> sp., <i>Pseudomonas fulva</i> , <i>Enterococcus faecalis</i> , <i>E. coli</i> , <i>Providencia rettgeri</i> ; + <i>Enterobacter cloacae</i> , yeast; diaphragm: ++ <i>Enterococcus faecalis</i> , <i>Pseudomonas fulva</i> , a-haemolytic streptococci, non-fermenter; + <i>Bacillus</i> sp., <i>Proteus</i> sp., <i>E. coli</i> , yeasts; liver: ++ <i>Pseudomonas putida</i> , <i>Enterococcus</i> sp., non-fermenter, a-haemolytic streptococci; + <i>E. coli</i> , <i>Myroides</i> sp., yeasts; spleen: +++ <i>Acinetobacter</i> sp., a-haemolytic streptococci; ++ <i>E. coli</i> , <i>Enterococcus</i> sp., <i>Pseudomonas fulva</i> , <i>Pseudomonas putida</i> ; + <i>Myroides</i> sp., <i>Proteus</i> sp.; intestine: ++ <i>E. coli</i> , + yeasts |
| 80 | Pv | yes | 03.08.2017 | yes | severe, acute, diffuse, alveolar pneumonia; mild, acute, diffuse hyperplasia of the lung lymph nodes; mild, acute diffuse hyperplasia of the tonsils; mild, chronic, focal, ulcerative gastritis; diarrhoea; mild, acute, diffuse, alveolar and interstitial lung emphysema; mild, acute, diffuse lung oedema | lung: moderate infection in bronchi and blood vessels; stomach: moderate infection; small intestine: moderate infection with acanthocephalan and cestodes                               | lung: +++ <i>Myroides odoratus</i> , <i>Streptococcus phocae</i> ; ++ a-haemolytic streptococci, <i>E. coli</i> , <i>Serratia fonticola</i> ; + <i>Enterococcus</i> sp., <i>Yarrowia lipolytica</i> ; liver: +++ <i>Streptococcus phocae</i> ; ++ a-haemolytic streptococci, <i>Myroides odoratus</i> , <i>E. coli</i> ; + <i>Enterococcus</i> sp., <i>Yarrowia lipolytica</i> ; intestine: ++ <i>Yarrowia lipolytica</i> , <i>E. coli</i> ; kidney: ++ <i>E. coli</i> , <i>Enterococcus faecalis</i> , a-haemolytic streptococci, <i>Streptococcus phocae</i> ; + <i>Yarrowia lipolytica</i> ; spleen: +++ <i>Streptococcus phocae</i> , a-haemolytic streptococci; ++ <i>E. coli</i> ; + <i>Myroides</i> sp., <i>Bacillus</i> sp., <i>Yarrowia lipolytica</i>                                                                                                                                                                                                                       |
| 81 | Pv | no  | 29.06.2017 | yes | cachexia; moderate, subacute, diffuse, purulent pneumonia; moderate acute, diffuse, alveolar oedema                                                                                                                                                                                                           | lung: severe infection in bronchi and blood vessels; stomach: mild infection; small intestine: moderate infection                                                                       | not determined                                                                                                                                                                                                                                                                                                                                                                                                                                                                                                                                                                                                                                                                                                                                                                                                                                                                                                                                                                        |

|    |    |     |            |     |                                                                                                                                                                                                                                                                                                                                                                                                                                                                                                                                                |                                                                                                                                       |                                                                                                                                                                                                                                                                                                                                                                                                                                                                                                                                                                                                                                                                                                                                                                                                                               |
|----|----|-----|------------|-----|------------------------------------------------------------------------------------------------------------------------------------------------------------------------------------------------------------------------------------------------------------------------------------------------------------------------------------------------------------------------------------------------------------------------------------------------------------------------------------------------------------------------------------------------|---------------------------------------------------------------------------------------------------------------------------------------|-------------------------------------------------------------------------------------------------------------------------------------------------------------------------------------------------------------------------------------------------------------------------------------------------------------------------------------------------------------------------------------------------------------------------------------------------------------------------------------------------------------------------------------------------------------------------------------------------------------------------------------------------------------------------------------------------------------------------------------------------------------------------------------------------------------------------------|
| 82 | Pv | yes | 29.11.2017 | yes | premature birth; subcutaneous haemorrhages at the head, neck and pelvis; diarrhoea; mild alveolar oedema                                                                                                                                                                                                                                                                                                                                                                                                                                       | none                                                                                                                                  | lung: + <i>Stenotrophomonas maltophilia</i> , yeasts, <i>Serratia marcescens</i> , <i>Enterococcus faecium</i> ; liver: + <i>Stenotrophomonas maltophilia</i> , <i>E. coli</i> , <i>Bacillus</i> sp., yeasts; kidney: + <i>Cedecea</i> sp., <i>Enterococcus faecium</i> , <i>Stenotrophomonas maltophilia</i> , yeasts; spleen: ++ <i>Stenotrophomonas maltophilia</i> ; + coagulase-negative Staphylococci, <i>E. coli</i> , yeasts; intestine: none                                                                                                                                                                                                                                                                                                                                                                         |
| 83 | Hg | no  | 24.07.2017 | yes | moderate, multifocal concretum deposition in and on the peritoneum of the abdominal wall, the intestine, the kidney and in the kidney; moderate haemo-hydro abdomen; mild, focal, ulcerative gastritis; mild haemo-hydro thorax and pericard; moderate hyperplasia of the pulpa of the spleen; multiple skin erosions on both hind flippers and the left abdominal wall; multiple loss of fur on the left abdominal wall; mild, diffuse, alveolar oedema; moderate, diffuse, alveolar and interstitial lung emphysema; suspicion of septicemia | lung: mild infection in the bronchi; heart: moderate infection in the left ventricle; stomach and small intestine: moderate infection | liver: + <i>Pseudomonas fulva</i> , a-haemolytic streptococci, <i>Proteus</i> sp., <i>E. coli</i> , <i>Enterococcus</i> sp.; lung: + a-haemolytic streptococci, <i>Proteus</i> sp., <i>Acinetobacter johnsonii</i> , <i>E. coli</i> , <i>Enterococcus</i> sp.; spleen: + a-haemolytic streptococci, <i>Acinetobacter johnsonii</i> , <i>E. coli</i> , <i>Enterococcus</i> sp.; stomach ulcer: a-haemolytic streptococci, non-fermenter, yeasts, <i>E. coli</i> , <i>Enterococcus</i> sp.; brain: ++ a-haemolytic streptococci; + <i>Proteus</i> sp., <i>E. coli</i> , <i>Enterococcus</i> sp.; intestine: none; lung lymphnode: + a-haemolytic streptococci, non-fermenter, <i>E. coli</i> ; uterus: ++ non-fermenter; a-haemolytic streptococci; + <i>Acinetobacter johnsonii</i> , <i>E. coli</i> , <i>Enterococcus</i> sp. |
| 85 | Pp | no  | 26.10.2017 | yes | anaemia; moderate, acute, diffuse, alveolar lung oedema                                                                                                                                                                                                                                                                                                                                                                                                                                                                                        | none                                                                                                                                  | brain: +++ non-fermenter, coagulase-negative staphylococci, $\alpha$ -haemolytic streptococci; ++ <i>E. coli</i> , <i>Citrobacter</i> sp., <i>Myroides</i> sp.; + yeasts, <i>Proteus</i> sp.; uterus: +++ <i>Rahnella aquatis</i> ; ++ <i>Serratia</i> sp., <i>Enterococcus</i> sp., coagulase-negative staphylococci, <i>E. coli</i> , <i>Bacillus</i> sp.; + <i>Enterobacter cloacae</i> , <i>Myroides</i> sp.                                                                                                                                                                                                                                                                                                                                                                                                              |

|    |    |     |            |     |                                                                                                                                                                                                                                                                                                                                                                                                                                                                                                       |                                                                                                                           |                                                                                                                                                                                                                                                                                                                                                                                                                                                                                                                                                                                                                                                                                                                                                                                                                                                                                                                                                                                                                                                                           |
|----|----|-----|------------|-----|-------------------------------------------------------------------------------------------------------------------------------------------------------------------------------------------------------------------------------------------------------------------------------------------------------------------------------------------------------------------------------------------------------------------------------------------------------------------------------------------------------|---------------------------------------------------------------------------------------------------------------------------|---------------------------------------------------------------------------------------------------------------------------------------------------------------------------------------------------------------------------------------------------------------------------------------------------------------------------------------------------------------------------------------------------------------------------------------------------------------------------------------------------------------------------------------------------------------------------------------------------------------------------------------------------------------------------------------------------------------------------------------------------------------------------------------------------------------------------------------------------------------------------------------------------------------------------------------------------------------------------------------------------------------------------------------------------------------------------|
| 86 | Pp | yes | 12.10.2017 | yes | cachexia; moderate, acute, diffuse, alveolar bronchopneumonia; mild, chronic focal, ulcerative oesophagitis; mild, chronic, focal, pyogranulomatous steatitis (abscess close to the blow whole); severe, chronic, diffuse necrotic mesenteric lymphadenitis; severe, chronic, diffuse hyperplasia of the cortex of the adrenal gland; severe, acute, diffuse, alveolar oedema; severe acute, diffuse spleen congestion                                                                                | lung: moderate infection in the bronchi; heart: moderate infection in the right atrium; ears both sides: severe infection | lung: +++ $\alpha$ -haemolytic streptococci; + <i>E. coli</i> ; pulmonic lymph node: ++ $\alpha$ -haemolytic streptococci; + <i>E. coli</i> ; spleen: + $\alpha$ -haemolytic streptococci, <i>Enterococcus</i> sp.; liver: ++ coagulase-negative staphylococci; + <i>E. coli</i> , <i>Yarrowia lipolytica</i> ; kidney: + <i>Streptococcus marimammali</i> , <i>E. coli</i> , $\beta$ -haemolytic streptococci; intestine: + <i>Yarrowia lipolytica</i> ; mesenteric lymph node: ++ <i>Yarrowia lipolytica</i> ; brain: ++ <i>Aeromonas</i> sp.; + <i>Yarrowia lipolytica</i> , $\alpha$ -haemolytic streptococci; swab of the aorta: +++ <i>Pseudomonas</i> spp., <i>Rahnella aquatilis</i> ; + <i>Serratia</i> spp., yeasts; swab of the lung: +++ <i>Pseudomonas</i> spp.; swab of the blow hole: +++ <i>Serratia liquefaciens</i> , <i>Pseudomonas</i> spp., <i>Ewingella americana</i> , <i>Rahnella aquatilis</i> , <i>Hafnia alvei</i> , <i>Aeromonas</i> spp., <i>Shewanella</i> spp., $\alpha$ -haemolytic streptococci; + yeasts; (+) <i>Vibrio anguillarum</i> |
| 92 | Pv | yes | 16.06.2017 | no  | mild emaciation; moderate, diffuse, catarrhalic-haemorrhagic enteritis; moderate diffuse catarrhalic-haemorrhagic gastritis; moderate disseminate, catarrhalic-purulent bronchopneumonia; mild, follicular hyperplasia of the spleen; moderate, disseminate, non-purulent hepatitis; mild lymphadenitis simplex of the lymph nodes of the pelvis; moderate hyperaemia of the blood vessels of the brain and the kidneys; moderate congestion of the lung and the liver; mild congestion of the spleen | none                                                                                                                      | lung: ++ <i>Carnobacterium maltaromaticum</i> , a-haemolytic streptococci, <i>E. coli</i> ; + non-fermenter, <i>Pantoea agglomerans</i> , <i>Lelliottia</i> species, yeasts, <i>Mucor</i> spp.; lung lymph node: + <i>Carnobacterium maltaromaticum</i> , <i>Acinetobacter</i> sp., a-haemolytic streptococci, <i>E. coli</i> ; spleen: ++ <i>Carnobacterium maltaromaticum</i> ; + <i>Bacillus</i> sp., <i>Pantoea agglomerans</i> , yeasts, <i>Myroides</i> sp., <i>E. coli</i> ; liver: ++ <i>Carnobacterium maltaromaticum</i> , <i>Acinetobacter</i> sp., yeasts; + <i>E. coli</i> , <i>Pantoea agglomerans</i> , <i>Proteus</i> sp.; kidney: ++ <i>Carnobacterium maltaromaticum</i> , <i>Acinetobacter</i> sp.; + yeasts, <i>Enterococcus faecalis</i> , <i>Pantoea agglomerans</i> ; intestine: + yeasts; mesenteric lymph node: + yeasts, <i>E. coli</i> ; brain: + <i>Carnobacterium maltaromaticum</i> , <i>E. coli</i>                                                                                                                                        |

|     |    |    |            |     |                                                                                                                                                                                                                                                                            |                                                                                                                       |                                                                                                                                                                                                                                                                                                                                                                                                                                                                                                                                                                                                                                                                                                                                                                                                                                                                                                                                                                                                                 |
|-----|----|----|------------|-----|----------------------------------------------------------------------------------------------------------------------------------------------------------------------------------------------------------------------------------------------------------------------------|-----------------------------------------------------------------------------------------------------------------------|-----------------------------------------------------------------------------------------------------------------------------------------------------------------------------------------------------------------------------------------------------------------------------------------------------------------------------------------------------------------------------------------------------------------------------------------------------------------------------------------------------------------------------------------------------------------------------------------------------------------------------------------------------------------------------------------------------------------------------------------------------------------------------------------------------------------------------------------------------------------------------------------------------------------------------------------------------------------------------------------------------------------|
| 93  | Pp | no | 24.08.2017 | yes | emphysema within the abdominal musculature, the pleura, the peritoneum and several organs; haematoma in the blubber and the musculature of the left body wall; haematoma in the area of the left kidney; diarrhoea                                                         | Lung: mild infection in the blood vessels; heart: mild infection in the right ventricle; right ear: mild infection    | lung: ++ <i>Proteus</i> sp., $\alpha$ -haemolytic streptococci, <i>E. coli</i> ; + <i>Serratia</i> sp., <i>Acinetobacter</i> sp., <i>Enterococcus</i> sp.; spleen: + $\alpha$ -haemolytic streptococci, <i>E. coli</i> , <i>Enterococcus</i> sp.; intestine: + yeasts; kidney: ++ <i>Saprolegnia</i> sp.; + <i>E. coli</i> , <i>Proteus</i> sp., $\alpha$ -haemolytic streptococci, non-fermenter; liver: + <i>Saprolegnia</i> sp., <i>Proteus</i> sp., <i>E. coli</i> , $\alpha$ -haemolytic streptococci, <i>Enterococcus</i> sp.                                                                                                                                                                                                                                                                                                                                                                                                                                                                             |
| 130 | Pp | no | 13.07.2017 | yes | severely changed, multi-cystic adrenal glands; severe chronic, multifocal cholangiohepatitis; small tumour at the diaphragm; several, small skin cuts; mild, subacute, diffuse emphysema of the lung; severe, acute, diffuse, alveolar and interstitial oedema of the lung | lung: moderate infection in bronchi and mild infection in blood vessels; liver: severe infection; ears not determined | lung: ++ <i>Enterococcus faecalis</i> ; + $\alpha$ -haemolytic streptococci, <i>E. coli</i> , <i>Pseudomonas putida</i> , <i>Streptococcus dysgalactiae</i> , yeasts, <i>Bacillus</i> sp.; pulmonal lymph node: ++ <i>Enterococcus faecalis</i> ; + <i>Streptococcus dysgalactiae</i> , <i>E. coli</i> , non-fermenter, yeasts, <i>Proteus</i> sp.; spleen: ++ <i>Enterococcus faecalis</i> ; + <i>Pseudomonas putida</i> , <i>E. coli</i> , yeasts, <i>Streptococcus dysgalactiae</i> ; liver: ++ <i>Enterococcus faecalis</i> ; + $\alpha$ -haemolytic streptococci, <i>E. coli</i> , <i>Pseudomonas putida</i> , yeasts; kidney: ++ <i>Enterococcus faecalis</i> ; + <i>Streptococcus dysgalactiae</i> , $\alpha$ -haemolytic streptococci, <i>E. coli</i> , <i>Bacillus</i> sp., yeasts, <i>Pseudomonas putida</i> , <i>Proteus</i> sp.; intestine: -; mesenteric lymph node: yeasts; brain: + <i>Enterococcus faecalis</i> , $\alpha$ -haemolytic streptococci, <i>Pseudomonas putida</i> , <i>E. coli</i> |

|     |    |    |            |    |                                                                                                                                                                                                                                                                                                                                                                                                                                                                                                          |                                                                                                                                                                               |                                                                                                                                                                                                                                                                                                                                                                                                                                                                                                                                                                                                                                                                                                                                                                                                                                                                                                                                                                                                                                    |
|-----|----|----|------------|----|----------------------------------------------------------------------------------------------------------------------------------------------------------------------------------------------------------------------------------------------------------------------------------------------------------------------------------------------------------------------------------------------------------------------------------------------------------------------------------------------------------|-------------------------------------------------------------------------------------------------------------------------------------------------------------------------------|------------------------------------------------------------------------------------------------------------------------------------------------------------------------------------------------------------------------------------------------------------------------------------------------------------------------------------------------------------------------------------------------------------------------------------------------------------------------------------------------------------------------------------------------------------------------------------------------------------------------------------------------------------------------------------------------------------------------------------------------------------------------------------------------------------------------------------------------------------------------------------------------------------------------------------------------------------------------------------------------------------------------------------|
| 131 | Pp | no | 07.08.2017 | no | moderate emaciation; netmarks; skin lesions on snout, flipper and fluke; haemorrhages in the blubber; moderate, subacute, multifocal, granulomatous bronchopneumonia; moderate, acute, diffuse emphysema of the lung; haemorrhages in the mucosa of the stomach; mild, chronic, oligofocal, fibrotic cholangitis; severe, acute, diffuse, alveolar lung oedema; mild congestion of the lung                                                                                                              | lung: severe infection in bronchi and moderate infection in blood vessels; heart: moderate infection right ventricle; liver: mild infection; ears: bilateral severe infection | lung: ++ <i>Chryseobacterium indologenes</i> ; + <i>E. coli</i> , yeasts, <i>Klebsiella oxytoca</i> , <i>Pseudomonas aeruginosa</i> ; pulmonal lymph node: ++ <i>Chryseobacterium indologenes</i> ; + <i>Pantoea</i> sp., yeasts, <i>E. coli</i> , <i>Pseudomonas aeruginosa</i> ; spleen: + <i>E. coli</i> , $\alpha$ -haemolytic streptococci; liver: + <i>Chryseobacterium indologenes</i> , <i>Klebsiella oxytoca</i> , <i>E. coli</i> , <i>Pseudomonas aeruginosa</i> ; kidney: ++ <i>Chryseobacterium indologenes</i> ; + <i>E. coli</i> , <i>Serratia marcescens</i> , yeasts, <i>Pseudomonas aeruginosa</i> ; intestine: -; mesenterial lymph node: + <i>E. coli</i> , yeasts; uterus: + <i>Chryseobacterium indologenes</i> , <i>E. coli</i> , yeasts, <i>Pseudomonas aeruginosa</i> ; brain: + <i>Stenotrophomonas maltophilia</i> , <i>Chryseobacterium indologenes</i> , <i>E. coli</i> , <i>Pseudomonas aeruginosa</i>                                                                                                |
| 132 | Pp | no | 29.08.2017 | no | linear skin wounds; mild, multifocal, petechial haemorrhages in the subcutis on the ventral abdominal wall; severe, diffuse congestion of the spleen and mesenterium; focal haematoma in the pancreas; mild liver congestion; diffuse haematoma under the capsule of the kidney; moderate congestion of the vessels of the right testis; moderate congestion of the lung; severe, diffuse, alveolar lung oedema; moderate congestion of the vessels of the brain and the meninges; suspicion of by-catch | none                                                                                                                                                                          | pulomal lymph node: + <i>Pseudomonas nitroreductans</i> , <i>Pseudomonas putida</i> , <i>Pantoea agglomerans</i> , yeasts, <i>Bacillus</i> sp., <i>Enterococcus faecalis</i> , <i>E. coli</i> ; lung: + <i>Stenophomonas maltophilia</i> , <i>Pseudomonas putida</i> , <i>Serratia</i> sp., yeasts, <i>Pantoea agglomerans</i> , <i>E. coli</i> , <i>Enterococcus faecalis</i> ; brain: + <i>Pseudomonas nitroreductans</i> , <i>Pseudomonas putida</i> , <i>Serratia</i> sp., yeasts, <i>Enterococcus faecalis</i> ; mesenteric lymph node: + yeasts; intestine: + yeasts; spleen: + <i>Pseudomonas nitroreductans</i> , yeasts, <i>E. coli</i> , <i>Enterococcus faecalis</i> ; kidney: + <i>Pseudomonas nitroreductans</i> , <i>Stenotrophomonas maltophilia</i> , yeasts, <i>Bacillus</i> sp., <i>Proteus</i> sp., <i>E. coli</i> , <i>Enterococcus faecalis</i> ; liver: + <i>Pseudomonas nitroreductans</i> , yeasts, <i>Pseudomonas putida</i> , <i>Lelliottia amnigena</i> , <i>E. coli</i> , <i>Enterococcus faecalis</i> |

|     |    |    |            |    |                                                                                                                                                                                                                                                                                                                                                                                                                                                                                           |                                                                                                                                     |                                                                                                                                                                                                                                                                                                                                                                                                                                                                                                                                                                                                                                                                                                                                                                                                                                                                                                                                |
|-----|----|----|------------|----|-------------------------------------------------------------------------------------------------------------------------------------------------------------------------------------------------------------------------------------------------------------------------------------------------------------------------------------------------------------------------------------------------------------------------------------------------------------------------------------------|-------------------------------------------------------------------------------------------------------------------------------------|--------------------------------------------------------------------------------------------------------------------------------------------------------------------------------------------------------------------------------------------------------------------------------------------------------------------------------------------------------------------------------------------------------------------------------------------------------------------------------------------------------------------------------------------------------------------------------------------------------------------------------------------------------------------------------------------------------------------------------------------------------------------------------------------------------------------------------------------------------------------------------------------------------------------------------|
| 135 | Pp | no | 04.11.2017 | no | severe, acute, diffuse, alveolar bronchopneumonia; moderate, chronic, multifocal, granulomatous bronchopneumonia; mild, chronic, multifocal, necrotizing steatitis and dermatitis; mild, chronic, diffuse, follicular hyperplasia of the white pulpa; mild, chronic, focal, ulcerative gastritis; moderate, chronic, diffuse, necrotizing lymphadenitis of the mesenterial lymph node; severe, acute, diffuse, alveolar oedema of the lung; mild, acute, diffuse, congestion of the liver | lung: severe infection in bronchi and blood vessels; heart: mild infection in the right ventricle; ears: bilateral severe infection | lung: ++ <i>Vagococcus fluvialis</i> , <i>Bacillus</i> sp., <i>Pseudomonas putida</i> ; + <i>E. coli</i> , coagulase-negative staphylococci, <i>Enterococcus</i> sp., <i>Proteus</i> sp.; pulmonal lymph node: ++ <i>E. coli</i> , <i>Vagococcus fluvialis</i> , <i>Bacillus</i> sp., <i>Pseudomonas putida</i> ; + <i>Enterococcus</i> sp., <i>Proteus</i> sp.; spleen: + $\alpha$ -haemolytic streptococci, <i>Bacillus</i> sp., <i>E. coli</i> , <i>Enterococcus</i> sp.; liver: ++ <i>Vagococcus fluvialis</i> , <i>Bacillus</i> sp.; + <i>E. coli</i> , <i>Enterococcus</i> sp.; kidney: + <i>Bacillus</i> sp., <i>Vagococcus fluvialis</i> , <i>E. coli</i> , <i>Enterococcus</i> sp.; intestine: + <i>E. coli</i> ; mesenteric lymph node: -; brain: + <i>E. coli</i> , coagulase-negative staphylococci; uterus: + <i>Vagococcus fluvialis</i> , <i>Serratia marcescens</i> , <i>E. coli</i> , <i>Enterococcus</i> sp. |
|-----|----|----|------------|----|-------------------------------------------------------------------------------------------------------------------------------------------------------------------------------------------------------------------------------------------------------------------------------------------------------------------------------------------------------------------------------------------------------------------------------------------------------------------------------------------|-------------------------------------------------------------------------------------------------------------------------------------|--------------------------------------------------------------------------------------------------------------------------------------------------------------------------------------------------------------------------------------------------------------------------------------------------------------------------------------------------------------------------------------------------------------------------------------------------------------------------------------------------------------------------------------------------------------------------------------------------------------------------------------------------------------------------------------------------------------------------------------------------------------------------------------------------------------------------------------------------------------------------------------------------------------------------------|

|     |    |    |            |    |                                                                                                                                                                                                                                                                                                                                                                                                                                                                                                                                                                                                                                                                          |                                                                                                                                          |                                                                                                                                                                                    |
|-----|----|----|------------|----|--------------------------------------------------------------------------------------------------------------------------------------------------------------------------------------------------------------------------------------------------------------------------------------------------------------------------------------------------------------------------------------------------------------------------------------------------------------------------------------------------------------------------------------------------------------------------------------------------------------------------------------------------------------------------|------------------------------------------------------------------------------------------------------------------------------------------|------------------------------------------------------------------------------------------------------------------------------------------------------------------------------------|
| 136 | Pp | no | 16.11.2017 | no | severe, acute, diffuse, alveolar bronchopneumonia; severe, chronic, multifocal, granulomatous bronchopneumonia; mild, chronic, oligofocal, granulomatous gastritis (2. compartment); mild, chronic, focal, pyogranulomatous gastritis (4. compartment); severe, chronic, diffuse, granulomatous gastritis (4. compartment); severe, chronic, diffuse, follicular hyperplasia of the white spleen pulpa; severe, chronic, diffuse, necrotizing lymphadenitis of the mesenterial lymph node; mild, chronic, diffuse, cortical hyperplasia of the mesenterial lymph node; severe, acute, diffuse, alveolar oedema of the lung; mild, acute, diffuse congestion of the liver | lung: severe infection in bronchi and moderate infection in the blood vessels; stomach: mild infection; ears: bilateral severe infection | lung: + <i>Bacillus</i> sp.; pulmonal lymph node: + coagulase-negative staphylococci; intestine: -; mesenterial lymph node: -; kidney: -; spleen: -; liver: -; brain: -; testis: - |
|-----|----|----|------------|----|--------------------------------------------------------------------------------------------------------------------------------------------------------------------------------------------------------------------------------------------------------------------------------------------------------------------------------------------------------------------------------------------------------------------------------------------------------------------------------------------------------------------------------------------------------------------------------------------------------------------------------------------------------------------------|------------------------------------------------------------------------------------------------------------------------------------------|------------------------------------------------------------------------------------------------------------------------------------------------------------------------------------|



|     |    |     |            |     |                                                                                                                                                                                                                                                                                  |                                                                        |                                                                                                                                                                                                                                                                                                                                                                                                                                                                                                                                                                                                                                                                                                                                                                                                                                                                                                                                                                                                                                                                                                                                                                                                                                                                                                                                                                                                                            |
|-----|----|-----|------------|-----|----------------------------------------------------------------------------------------------------------------------------------------------------------------------------------------------------------------------------------------------------------------------------------|------------------------------------------------------------------------|----------------------------------------------------------------------------------------------------------------------------------------------------------------------------------------------------------------------------------------------------------------------------------------------------------------------------------------------------------------------------------------------------------------------------------------------------------------------------------------------------------------------------------------------------------------------------------------------------------------------------------------------------------------------------------------------------------------------------------------------------------------------------------------------------------------------------------------------------------------------------------------------------------------------------------------------------------------------------------------------------------------------------------------------------------------------------------------------------------------------------------------------------------------------------------------------------------------------------------------------------------------------------------------------------------------------------------------------------------------------------------------------------------------------------|
| 148 | Ph | yes | 11.06.2017 | yes | severe, multifocal, subacute, abscess-forming lymphadenitis; severe, subacute, diffuse bronchopneumonia; severe hyperplasia of the spleen with mild follicular hyperplasia; moderate hypertrophy of the right heart; mild, acute, diffuse, alveolar oedema of the lung           | lung: mild nematodes in bronchi; small intestine: mild acanthocephalan | lung: +++ <i>Hafnia alvei</i> , <i>Carnobacterium maltaromaticum</i> ; ++ <i>Raoultella planticola</i> , <i>Enterococcus casseliflavus</i> , <i>Streptococcus dysgalactiae</i> ; + <i>Proteus</i> sp.; lymphnode of the lung: <i>Hafnia alvei</i> , <i>Carnobacterium maltaromaticum</i> , <i>Enterococcus casseliflavus</i> ; ++ <i>Raoultella planticola</i> ; spleen: +++ <i>Hafnia alvei</i> ; ++ <i>Raoultella planticola</i> , <i>Enterococcus casseliflavus</i> ; + <i>Proteus</i> sp.; liver: <i>Hafnia alvei</i> , <i>Enterococcus durans</i> ; ++ <i>Raoultella planticola</i> , anhaemolytic streptococci; + <i>Proteus</i> sp.; brain: <i>Hafnia alvei</i> , anhaemolytic streptococci, <i>Carnobacterium maltaromaticum</i> ; ++ <i>Raoultella planticola</i> , <i>Streptococcus dysgalactiae</i> ; + <i>Proteus</i> sp.; swab of the abscess: +++ <i>Hafnia alvei</i> ; + <i>Enterococcus</i> sp., a-haemolytic streptococci; abscess: ++ <i>Hafnia alvei</i> , <i>Enterococcus casseliflavus</i> ; + <i>Raoultella planticola</i> , <i>Streptococcus dysgalactiae</i> , <i>Clostridium bifermentans</i> , <i>Fusobacterium varium</i> ; intestine: ++ <i>Yarowia lipolytica</i> , <i>E. coli</i> ; lymphnode of the intestine: + <i>E. coli</i> ; kidney: +++ <i>Hafnia alvei</i> ; ++ <i>Enterobacter cloacae</i> , <i>Streptococcus dysgalactiae</i> , a-haemolytic streptococci, <i>Enterococcus</i> sp. |
| 169 | Hg | no  | 02.07.2018 | yes | mild, acute, diffuse, catarrhalic bronchopneumonia; mild chronic, focal, ulcerative colitis; mild, chronic, focal follicular hyperplasia of the mesenteric lymphnode; severe, chronic diffuse hyperplasia of the peyer patches in the ileum; mild, acute, focal, alveolar oedema | small intestine: mild acanthocephalan; colon: severe acanthocephalan   | lung: +++ <i>Psychrobacter sanguinis</i> ; ++ <i>Streptococcus dysgalactiae</i> ; + <i>Myroides</i> sp.; liver: ++ $\beta$ -haemolytic streptococci, <i>Psychrobacter sanguinis</i> , <i>Myroides</i> sp.; + <i>E. coli</i> , <i>Enterococcus</i> sp.; kidney: ++ <i>Psychrobacter sanguinis</i> ; + <i>E. coli</i> , $\beta$ -haemolytic streptococci; intestine: -; spleen: ++ $\beta$ -haemolytic streptococci; + <i>Psychrobacter sanguinis</i> , <i>Pseudomonas putida</i> , anhaemolytic streptococci, <i>Bacillus</i> sp.; testis: + $\beta$ -haemolytic streptococci, <i>Psychrobacter sanguinis</i> , <i>Enterococcus</i> sp.; brain: + <i>Streptococcus dysgalactiae</i> , $\alpha$ -haemolytic streptococci                                                                                                                                                                                                                                                                                                                                                                                                                                                                                                                                                                                                                                                                                                     |

|     |    |     |            |    |                                                                                                                                                                                                                                                                                                                                                                                                                                         |                                                                                                                                |                                                                                                                                                                                                                                                                                                                                                                                                                                                                                                                                                                                                                                                                                                                                                                                                                                                                                                                                                 |
|-----|----|-----|------------|----|-----------------------------------------------------------------------------------------------------------------------------------------------------------------------------------------------------------------------------------------------------------------------------------------------------------------------------------------------------------------------------------------------------------------------------------------|--------------------------------------------------------------------------------------------------------------------------------|-------------------------------------------------------------------------------------------------------------------------------------------------------------------------------------------------------------------------------------------------------------------------------------------------------------------------------------------------------------------------------------------------------------------------------------------------------------------------------------------------------------------------------------------------------------------------------------------------------------------------------------------------------------------------------------------------------------------------------------------------------------------------------------------------------------------------------------------------------------------------------------------------------------------------------------------------|
| 172 | Pp | yes | 24.05.2018 | no | moderate, chronic, multifocal, granulomatous bronchopneumonia; severe follicular hyperplasia of the spleen; severe, chronic, diffuse, follicular hyperplasia of the mesenterial lymph node; severe, chronic, multifocal bile duct hyperplasia/cholangitis; severe, chronic, diffuse, cortex hyperplasia of the adrenal glands; severe, chronic, diffuse hyperplasia of the thyroid; severe, acute, diffuse, alveolar oedema of the lung | lung: severe infection in bronchi and mild infection in blood vessels; liver: mild infection; ears: bilateral severe infection | lung: +++ <i>Streptococcus dysgalactiae</i> ; ++ <i>E. coli</i> ; pulmonal lymph node: +++ <i>Streptococcus dysgalactiae</i> ; + <i>E. coli</i> ; spleen: +++ <i>Streptococcus dysgalactiae</i> ; + <i>E. coli</i> ; liver: + <i>Streptococcus dysgalactiae</i> , <i>E. coli</i> ; kidney: ++ <i>Streptococcus dysgalactiae</i> ; + <i>E. coli</i> ; intestine: + <i>E. coli</i> ; mesenterial lymph node: + <i>E. coli</i> ; uterus: +++ <i>Streptococcus dysgalactiae</i> ; + <i>E. coli</i> ; mamma: +++ <i>Streptococcus dysgalactiae</i> ; + <i>E. coli</i> ; brain: ++ <i>Streptococcus dysgalactiae</i> , <i>E. coli</i> ; + <i>Pseudomonas aeruginosa</i>                                                                                                                                                                                                                                                                               |
| 193 | Pp | yes | 02.08.2018 | no | mild, acute congestion of the liver; moderate, focal, activation of the lymphatic tissue; severe, acute, diffuse, alveolar oedema of the lung; suspicion of by-catch                                                                                                                                                                                                                                                                    | none                                                                                                                           | lung: + <i>Lelliottia amnigena</i> , <i>Klebsiella pneumoniae</i> , <i>Proteus</i> sp.; pulonal lymph node: + <i>Klebsiella pneumoniae</i> ; spleen: -; liver: -; kidney: + <i>Lelliottia amnigena</i> , <i>Pantoea agglomerans</i> , <i>Pseudomonas aeruginosa</i> , <i>E. coli</i> ; intestine: -; mesenterial lymph node: -; testis: -                                                                                                                                                                                                                                                                                                                                                                                                                                                                                                                                                                                                       |
| 208 | Ph | yes | 02.09.2018 | no | mild, chronic, multifocal, cortical follicular hyperplasia of the mesenteric lymphnode; mild, acute, catarrhalic gastritis of the glandular fundus region; mild, chronic, diffuse, catarrhalic bronchopneumonia; haemoperitoneum; severe, acute, diffuse, alveolar lung oedema; severe, acute, diffuse lung congestion; suspicion of sepsis                                                                                             | small intestine: moderate acanthocephalan                                                                                      | intestine: + <i>E. coli</i> ; lung: ++ <i>Acinetobacter</i> sp.; + <i>Shewanella putrefaciens</i> , $\alpha$ -haemolytic streptococci, yeast, <i>Proteus</i> sp., <i>E. coli</i> ; liver: ++ <i>Lactococcus garvieae</i> ; + <i>Proteus</i> sp., <i>Aeromonas veronii</i> , <i>E. coli</i> ; kidney: + <i>Lactococcus garvieae</i> , <i>Morganella morganii</i> , <i>Proteus</i> sp., <i>E. coli</i> ; spleen: + <i>Lactococcus garvieae</i> , $\alpha$ -haemolytic streptococci, <i>Proteus</i> sp., <i>E. coli</i> ; pulmonal lymphnode: ++ <i>Lactococcus garvieae</i> ; + <i>Morganella morganii</i> , <i>Shewanella putrefaciens</i> , $\alpha$ -haemolytic streptococci, yeast, <i>Proteus</i> sp., <i>E. coli</i> ; testis: + <i>Aeromonas</i> sp., $\alpha$ -haemolytic streptococci, <i>E. coli</i> ; brain: <i>Proteus</i> sp., <i>Shewanella putrefaciens</i> , <i>Lactococcus garvieae</i> , <i>E. coli</i> ; mesenteric lymphnode: |

|     |    |     |            |    |                                                                                                                                                           |                                                                                                                                        |                                                                                                                                                                                                                                                                                                                                                                     |
|-----|----|-----|------------|----|-----------------------------------------------------------------------------------------------------------------------------------------------------------|----------------------------------------------------------------------------------------------------------------------------------------|---------------------------------------------------------------------------------------------------------------------------------------------------------------------------------------------------------------------------------------------------------------------------------------------------------------------------------------------------------------------|
| 210 | Ph | no  | 12.06.2018 | no | no necropsy report                                                                                                                                        | stomach/small intestine: tapeworm (unknown severity); colon: acanthocephalan (unknown severity); investigation of other organs unknown | nose: +++ <i>Shewanella</i> spp., <i>Pseudomonas</i> spp., <i>Aeromonas</i> spp., + <i>E. coli</i> ; vagina: +++ <i>Pseudomonas</i> spp., + <i>E. coli</i> var. <i>haem.</i> , a-haemolytic streptococci                                                                                                                                                            |
| 211 | Ph | yes | 13.06.2018 | no | no necropsy report                                                                                                                                        | colon: mild acanthocephalan infection; investigation of other organs unknown                                                           | rectum: +++ <i>Pseudomonas</i> spp., + <i>E. coli</i> , <i>Shewanella</i> spp.                                                                                                                                                                                                                                                                                      |
| 212 | Ph | yes | 14.06.2018 | no | no necropsy report                                                                                                                                        | small intestine: acanthocephalan infection of unknown severity; investigation of other organs unknown                                  | rectum: +++ <i>Pseudomonas</i> spp., <i>Shewanella</i> spp.; ++ <i>E. coli</i> var. <i>haem.</i> , + <i>E. coli</i> , (+) <i>Clostridium perfringens</i>                                                                                                                                                                                                            |
| 214 | Ph | yes | 14.06.2018 | no | right adrenal glands enlarged + mild hyperplasia of the cortex; cyst in the uterus; multiparus; 5 cm sized cyst left side of the third cervicale vertebra | small intestine and caecum: mild acanthocephalan infection; negative: lung, heart, liver; unknown: stomach, skin                       | rectum: +++ <i>E. coli</i> , <i>Pseudomonas</i> spp., <i>Clostridium perfringens</i> ; ++ <i>Shewanella</i> spp.; vagina: +++ Pasteurellaceae, <i>Pseudomonas</i> spp.; ++ <i>E. coli</i> ; + <i>Shewanella</i> spp.; uterus: +++ <i>E. coli</i> , <i>Pseudomonas</i> spp.; left cornus uteri: +++ <i>E. coli</i> , <i>Pseudomonas</i> spp., <i>Shewanella</i> spp. |

|     |    |     |            |     |                                                                                                                                                                                                                       |                                                                        |                                                                                                                                                                                                                                                                                                                                                                                                                                                                                                                                                                                                                                                                                                                                                                                                                                                                                                                                                                                                                                                                                 |
|-----|----|-----|------------|-----|-----------------------------------------------------------------------------------------------------------------------------------------------------------------------------------------------------------------------|------------------------------------------------------------------------|---------------------------------------------------------------------------------------------------------------------------------------------------------------------------------------------------------------------------------------------------------------------------------------------------------------------------------------------------------------------------------------------------------------------------------------------------------------------------------------------------------------------------------------------------------------------------------------------------------------------------------------------------------------------------------------------------------------------------------------------------------------------------------------------------------------------------------------------------------------------------------------------------------------------------------------------------------------------------------------------------------------------------------------------------------------------------------|
| 215 | Pv | yes | 18.10.2018 | yes | cachexia; severe, acute, diffuse, catarrhalic bronchopneumonia; mild, acute, diffuse, interstitial lung emphysema; severe, acute, diffuse, catarrhalic conjunctivitis; mild, acute, diffuse, alveolar lung oedema     | heart: mild in the right atrium; small intestine: mild acanthocephalan | lung: +++ <i>Enterococcus faecalis</i> ; ++ <i>E. coli</i> ; + <i>Proteus</i> sp., yeast, <i>Myroides</i> sp.; pulmonal lymphnode: ++ <i>Enterococcus faecalis</i> , <i>E. coli</i> ; + <i>Proteus</i> sp., <i>Myroides</i> sp.; spleen: ++ <i>Enterococcus faecalis</i> , <i>E. coli</i> ; + <i>Proteus</i> sp., <i>Myroides</i> sp.; liver: +++ <i>Enterococcus faecalis</i> ; ++ <i>E. coli</i> ; + <i>Proteus</i> sp., <i>Myroides</i> sp.; kidney: +++ <i>Enterococcus faecalis</i> ; ++ <i>E. coli</i> ; + <i>Proteus</i> sp., <i>Myroides</i> sp., yeast; intestine: ++ <i>E. coli</i> ; + yeast; swab of the eye: +++ <i>Pseudomonas</i> sp., <i>E. coli</i> , <i>Pantoea agglomerans</i> ; ++ <i>Enterococcus faecalis</i> , <i>Chryseobacterium scophthalmum</i> ; + <i>Proteus</i> sp., <i>Myroides</i> sp.; uterus: +++ <i>Enterococcus faecalis</i> ; ++ <i>E. coli</i> , yeast; + <i>Proteus</i> sp., <i>Myroides</i> sp.; brain: +++ <i>Enterococcus faecalis</i> ; ++ <i>Raoultella planticola</i> , <i>E. coli</i> ; + <i>Proteus</i> sp., <i>Myroides</i> sp. |
| 216 | Pp | no  | 29.10.2018 | yes | moderate emaciation; luxation of 3 ribs; haemorrhages in the subcutis and rete mirabile; mild lung congestion; suspicion of trauma                                                                                    | none                                                                   | not determined                                                                                                                                                                                                                                                                                                                                                                                                                                                                                                                                                                                                                                                                                                                                                                                                                                                                                                                                                                                                                                                                  |
| 218 | Pp | no  | 15.11.2018 | yes | moderate focal haemorrhages in the acoustic fatty tissue of the left side; moderate, oligofocal, areal hypertrophia of the mucosa of the small intestine; mild, oligofocal liver cell necrosis; suspicion of by-catch | none                                                                   | lung: +++ <i>Lelliottia amnigena</i> ; ++ <i>Enterococcus faecalis</i> ; + <i>E. coli</i> ; pulmonal lymph node: ++ <i>Lelliottia amnigena</i> , <i>Enterococcus faecalis</i> ; + <i>E. coli</i> , <i>Proteus</i> sp., <i>Myroides</i> sp.; spleen: ++ <i>Enterococcus faecalis</i> ; + <i>E. coli</i> , <i>Pantoea agglomerans</i> , $\alpha$ -haemolytic streptococci; liver: ++ <i>Lelliottia amnigena</i> , <i>Enterococcus faecalis</i> ; + <i>E. coli</i> , <i>Pantoea agglomerans</i> ; kidney: ++ <i>Lelliottia amnigena</i> , <i>Enterococcus faecalis</i> ; + <i>E. coli</i> , <i>Pantoea agglomerans</i> ; intestine: -; mesenterial lymph node: + <i>E. coli</i> ; testis: ++ <i>Lelliottia amnigena</i> , <i>Lactococcus garvieae</i> , <i>Enterococcus faecalis</i> ; + <i>Pantoea agglomerans</i> , <i>Myroides</i> sp., <i>E. coli</i>                                                                                                                                                                                                                          |

|     |    |    |            |    |                                                                                                                                                                                                                                                                                                                                                                                                                                                                                                      |                                                                                                                                                                                       |                                                                                                                                                                                                                                                                                                                                                                                                                                                                                                                                                                                                                                                                                                                                                                                                                                                                                                                                                                                                                                                                                                                                                                                                                                                                                |
|-----|----|----|------------|----|------------------------------------------------------------------------------------------------------------------------------------------------------------------------------------------------------------------------------------------------------------------------------------------------------------------------------------------------------------------------------------------------------------------------------------------------------------------------------------------------------|---------------------------------------------------------------------------------------------------------------------------------------------------------------------------------------|--------------------------------------------------------------------------------------------------------------------------------------------------------------------------------------------------------------------------------------------------------------------------------------------------------------------------------------------------------------------------------------------------------------------------------------------------------------------------------------------------------------------------------------------------------------------------------------------------------------------------------------------------------------------------------------------------------------------------------------------------------------------------------------------------------------------------------------------------------------------------------------------------------------------------------------------------------------------------------------------------------------------------------------------------------------------------------------------------------------------------------------------------------------------------------------------------------------------------------------------------------------------------------|
| 221 | Pp | no | 17.11.2018 | no | severe, chronic, multifocal, granulomatous bronchopneumonia; mild, chronic, focal, pyogranulomatous bronchopneumonia; severe, chronic, diffuse, granulomatous gastritis (4. compartment); mild chronic, focal, necrotizing steatitis; mild, chronic, focal, pyogranulomatous statitis; severe, acute, diffuse, follicular hyperplasia; severe, acute, diffuse hyperplasia of the tonsil; severe, acute, diffuse, alveolar oedema of the lung; mild, acute, diffuse congestion of the liver; by-catch | lung: severe infection in the bronchi and moderate infection in the blood vessels; heart: mild infection of the right atrium; liver: mild infection; ears: severe infection bilateral | lung: ++ <i>Acinetobacter</i> sp.; + <i>Proteus</i> sp., <i>E. coli</i> , α-haemolytic streptococci, anhaemolytic streptococci, <i>Streptococcus phocae</i> , <i>Enterococcus</i> sp.; pulmonal lymph node: ++ <i>Psychrobacter sanguinis</i> ; + <i>E. coli</i> , α-haemolytic streptococci, anhaemolytic streptococci, <i>Streptococcus phocae</i> , <i>Pseudomonas rhodesiae</i> , <i>Enterococcus</i> sp., <i>Proteus</i> sp.; spleen: ++ <i>Psychrobacter sanguinis</i> ; + <i>E. coli</i> , coagulase-negative streptococci, <i>Enterococcus faecalis</i> ; liver: + <i>Psychrobacter sanguinis</i> ; <i>E. coli</i> , coagulase-negative streptococci, <i>Pseudomonas rhodesiae</i> , <i>Enterococcus faecalis</i> , <i>Proteus</i> sp.; kidney: ++ <i>E. coli</i> , anhaemolytic streptococci; + <i>Proteus</i> sp., α-haemolytic streptococci; intestine: -; mesenterial lymph node: -; stomach: ++ <i>Psychrobacter sanguinis</i> , <i>Penicillium</i> sp.; + <i>E. coli</i> , anhaemolytic streptococci, <i>Proteus</i> sp., <i>Enterococcus faecalis</i> , <i>Yarrowia lipolytica</i> ; testis: + <i>Enterococcus faecalis</i> , <i>Enterococcus faecium</i> , <i>Pantoea agglomerans</i> ; brain: + <i>Staphylococcus lugdunensis</i> , <i>Pseudomonas putida</i> |
|-----|----|----|------------|----|------------------------------------------------------------------------------------------------------------------------------------------------------------------------------------------------------------------------------------------------------------------------------------------------------------------------------------------------------------------------------------------------------------------------------------------------------------------------------------------------------|---------------------------------------------------------------------------------------------------------------------------------------------------------------------------------------|--------------------------------------------------------------------------------------------------------------------------------------------------------------------------------------------------------------------------------------------------------------------------------------------------------------------------------------------------------------------------------------------------------------------------------------------------------------------------------------------------------------------------------------------------------------------------------------------------------------------------------------------------------------------------------------------------------------------------------------------------------------------------------------------------------------------------------------------------------------------------------------------------------------------------------------------------------------------------------------------------------------------------------------------------------------------------------------------------------------------------------------------------------------------------------------------------------------------------------------------------------------------------------|

|     |    |     |            |    |                                                                                                                                                                                                                                                                                                                                                                                                                                                                                                                                                                               |                                                                                                                     |                                                                                                                                                                                                                                                                                                                                    |
|-----|----|-----|------------|----|-------------------------------------------------------------------------------------------------------------------------------------------------------------------------------------------------------------------------------------------------------------------------------------------------------------------------------------------------------------------------------------------------------------------------------------------------------------------------------------------------------------------------------------------------------------------------------|---------------------------------------------------------------------------------------------------------------------|------------------------------------------------------------------------------------------------------------------------------------------------------------------------------------------------------------------------------------------------------------------------------------------------------------------------------------|
| 222 | Pp | yes | 03.12.2018 | no | severe, chronic, diffuse, granulomatous bronchopneumonia; cholangitis, pericholangitis and proliferation of the bile ducts; mild, acute, diffuse, ulceration of the oesophagus; severe, chronic, diffuse, granulomatous lymphadenitis of the mesenterial lymph node; suspicion of acute, diffuse cystitis; suspicion of acute, diffuse tonsillitis bilateral; suspicion of mild, acute, multifocal plaques of the stomach mucosa; multiple net marks; severe, acute, diffuse, alveolar, oedema of the lung; severe, acute, diffuse congestion of the lung and liver; by-catch | lung: severe infection in the bronchi and moderate infection in the blood vessels; ears: severe infection bilateral | lung: + <i>Enterococcus</i> sp., <i>Morganella morganii</i> ; pulmonal lymph node: + <i>Enterococcus</i> sp.; spleen: -; liver: -; kidney: + coagulase-negative staphylococci, <i>Pseudomonas</i> sp., <i>Enterococcus</i> sp.; intestine: -; mesenterial lymph node: -; testis: + non-fermenter; brain: + <i>Enterococcus</i> sp. |
|-----|----|-----|------------|----|-------------------------------------------------------------------------------------------------------------------------------------------------------------------------------------------------------------------------------------------------------------------------------------------------------------------------------------------------------------------------------------------------------------------------------------------------------------------------------------------------------------------------------------------------------------------------------|---------------------------------------------------------------------------------------------------------------------|------------------------------------------------------------------------------------------------------------------------------------------------------------------------------------------------------------------------------------------------------------------------------------------------------------------------------------|

|     |    |     |            |     |                                                                                                                                                       |                                                                                                                                                              |                                                                                                                                                                                                                                                                                                                                                                                                                                                                                                                                                                                                                                                                                                                                                                                                                                                                                                                                                                                                                                                                                                                                                        |
|-----|----|-----|------------|-----|-------------------------------------------------------------------------------------------------------------------------------------------------------|--------------------------------------------------------------------------------------------------------------------------------------------------------------|--------------------------------------------------------------------------------------------------------------------------------------------------------------------------------------------------------------------------------------------------------------------------------------------------------------------------------------------------------------------------------------------------------------------------------------------------------------------------------------------------------------------------------------------------------------------------------------------------------------------------------------------------------------------------------------------------------------------------------------------------------------------------------------------------------------------------------------------------------------------------------------------------------------------------------------------------------------------------------------------------------------------------------------------------------------------------------------------------------------------------------------------------------|
| 223 | Pv | yes | 06.12.2018 | yes | cachexia; moderate, subacute, diffuse, granulomatous bronchopneumonia; wounds on the head; diarrhoea; mild cystitis; mild, acute, diffuse lung oedema | lung: moderate infection in bronchi and blood vessels; small intestine: mild acanthocephalan                                                                 | lung: +++ <i>Streptococcus phocae</i> ; + <i>Brucella</i> sp., <i>Proteus</i> sp., <i>Pantoea agglomerans</i> , <i>E. coli</i> , <i>Enterococcus</i> sp.; pulmonal lymph node: ++ <i>Streptococcus phocae</i> , anhaemolytic streptococci; + <i>Proteus</i> sp., <i>Pantoea agglomerans</i> , <i>E. coli</i> , <i>Enterococcus</i> sp., moult fungus; spleen: ++ <i>Streptococcus phocae</i> ; + <i>Proteus</i> sp., <i>Pantoea agglomerans</i> , <i>E. coli</i> , <i>Enterococcus</i> sp., moult fungus; liver: ++ <i>Streptococcus phocae</i> ; + <i>Proteus</i> sp., <i>Pantoea agglomerans</i> , <i>E. coli</i> , <i>Enterococcus</i> sp., moult fungus; kidney: ++ <i>Streptococcus phocae</i> , <i>Streptococcus dysgalactiae</i> , <i>Pantoea agglomerans</i> ; + <i>Proteus</i> sp., <i>E. coli</i> , <i>Enterococcus</i> sp.; intestine: + <i>E. coli</i> ; mesenterial lymph node: + <i>E. coli</i> ; testis: + <i>Pantoea agglomerans</i> , <i>E. coli</i> , <i>Enterococcus</i> sp.; brain: +++ <i>Streptococcus phocae</i> ; ++ <i>Pantoea agglomerans</i> , <i>Proteus</i> sp., <i>E. coli</i> , <i>Enterococcus</i> sp.; + moult fungus |
| 226 | Ph | no  | 04.06.2019 | no  | moderate endoparasitosis                                                                                                                              | small intestine: moderate acanthocephalan (in the middle part); large intestine: mild acanthocephalan; part small to large intestine: severe acanthocephalan | liver: (+) <i>Staph. saprophyticus</i> , <i>Athrobacter</i> spp., <i>Micrococcus luteus</i> ; spleen: (+) $\alpha$ -haemolytic streptococci; kidney: (+) <i>Pseudomonas</i> spp.; Lunge: + <i>Pseudomonas</i> spp., $\alpha$ -haemolytic streptococci, <i>Pasteurellaceae</i> ; pulmonal lymphnode: (+) $\alpha$ -haemolytic streptococci; intestine: (+) <i>Pseudomonas</i> spp., + <i>Psychrobacter</i> spp., <i>Kocuria</i> spp., <i>Clostridium perfringens</i> ; mesenterial lymphnode: (+) <i>Pseudomonas</i> spp., + <i>Psychrobacter</i> spp.; CNS: (+) <i>Pseudomonas</i> spp., (+) <i>Pseudomonas</i> spp., + <i>Psychrobacter</i> spp.; rectal swab: + <i>Pseudomonas</i> spp.                                                                                                                                                                                                                                                                                                                                                                                                                                                              |

|     |    |     |            |    |                                                                                                                                                                                                           |                                                                                                 |                                                                                                                                                                                                                                                                                                                                                                                                                                                                                                                                                                      |
|-----|----|-----|------------|----|-----------------------------------------------------------------------------------------------------------------------------------------------------------------------------------------------------------|-------------------------------------------------------------------------------------------------|----------------------------------------------------------------------------------------------------------------------------------------------------------------------------------------------------------------------------------------------------------------------------------------------------------------------------------------------------------------------------------------------------------------------------------------------------------------------------------------------------------------------------------------------------------------------|
| 227 | Ph | yes | 05.06.2019 | no | serositis spleen, moderate endoparasitosis                                                                                                                                                                | small intestine: moderate acanthocephalan; large intestine: moderate acanthocephalan            | liver: (+) <i>E. coli</i> ; spleen: (+) <i>E. coli</i> , <i>E. coli</i> var. <i>haemolytica</i> ; kidney: (+) <i>E. coli</i> ; lung: (+) <i>E. coli</i> , coryneform bacteria; pulmonal lymphnode: (+) coryneform bacteria; intestine: +++ <i>Clostridium perfringens</i> ; mesenteric lymphnode: (+) <i>E. coli</i> ; uterus: + <i>Sc. dysgalactiae</i> ; rectal swab: +++ <i>Cl. perfringens</i> , <i>Providencia rettgeri</i> , <i>Pseudomonas</i> spp., ++ <i>E. coli</i> ; vaginal swab: +++ <i>Pseudomonas</i> spp., + <i>E. coli</i> , <i>Cl. perfringens</i> |
| 228 | Ph | yes | 05.06.2019 | no | moderate chronic colitis; severe infection with acanthocephalan; mild, acute, diffuse, granulomatous pneumonia; mild follicular hyperplasia of the spleen; moderate hyperplasia of the adrenal cortex     | small intestine: second half with mild acanthocephalan; large intestine: severe acanthocephalan | spleen and lung: (+) $\alpha$ -haemolytic streptococci, coryneform bacteria; testis: (+) coryneform bacteria; rectal swab: +++ <i>Shewanella</i> spp., + <i>E. coli</i> , <i>Sc. dysgalactiae</i>                                                                                                                                                                                                                                                                                                                                                                    |
| 229 | Ph | no  | 05.06.2019 | no | diarrhoea; moderate infection with acanthocephalan; mild, acute, oligofocal, granulomatous pneumonia                                                                                                      | small and large intestine: moderate acanthocephalan                                             | spleen: <i>Staph. warneri</i> , <i>Sc. dysgalactiae</i> ssp. <i>equisimilis</i> , $\alpha$ -haemolytic streptococci; kidney and intestine: (+) <i>Sc. dysgalactiae</i> ssp. <i>equisimilis</i> ; testis: + <i>Sc. dysgalactiae</i> ssp. <i>equisimilis</i> ; rectal swab: +++ <i>Pseudomonas</i> spp.                                                                                                                                                                                                                                                                |
| 230 | Ph | no  | 06.06.2019 | no | moderate, chronic, ulcerative colitis; moderate to severe infection of acanthocephalan; ovarian cyst (left ovary)                                                                                         | small intestine: severe acanthocephalan; large intestine: moderate acanthocephalan              | liver, spleen, kidney, mesenteric lymphnode: + <i>E. coli</i> , <i>E. coli</i> var. <i>haem.</i> ; lung, pulmonal lymphnode, CNS, uterus: (+) <i>E. coli</i> , <i>E. coli</i> var. <i>haem.</i> ; intestine: (+) <i>E. coli</i> var. <i>haem.</i> ; rectal swab: +++ <i>E. coli</i> , <i>Cl. perfringens</i> , <i>Acinetobacter</i> spp.; + <i>E. coli</i> var. <i>haem.</i> ; vaginal swab: +++ <i>E. coli</i> , <i>Stenothrophomonas</i> spp.; + <i>E. coli</i> var. <i>haem.</i> , <i>Pantoea</i> spp.                                                            |
| 231 | Ph | no  | 07.06.2019 | no | moderate infection with acanthocephalan; mild, acute, diffuse pneumonia; pulmonal lymphadenitis; moderate follicular hyperplasia of the spleen; abrasion of the claws of the forelimbs; mild oesophagitis | small intestine and colon: moderate acanthocephalan                                             | intestine: (+) <i>Cl. perfringens</i> ; rectal swab: ++ <i>Cl. perfringens</i> , + <i>Pseudomonas</i> spp., <i>Corynebacterium</i> spp., $\alpha$ -haemolytic streptococci; vaginal swab: no growth                                                                                                                                                                                                                                                                                                                                                                  |



|     |    |     |            |    |                                                                                                                                                                                              |                                                                                  |                                                                                                                                                                                                                                                                                                                                                                                                                                                                                                                                                                                                  |
|-----|----|-----|------------|----|----------------------------------------------------------------------------------------------------------------------------------------------------------------------------------------------|----------------------------------------------------------------------------------|--------------------------------------------------------------------------------------------------------------------------------------------------------------------------------------------------------------------------------------------------------------------------------------------------------------------------------------------------------------------------------------------------------------------------------------------------------------------------------------------------------------------------------------------------------------------------------------------------|
| 232 | Ph | yes | 07.06.2019 | no | ovarian cyst (left ovary); moderate, chronic enteritis; mild, diffuse, catarrhalic enteritis; mild acanthocephalan infection; mild follicular hyperplasia of the spleen; mild lung emphysema | small intestine: mild acanthocephalan; large intestine: mild acanthocephalan     | spleen, kidney: (+) <i>E. coli</i> , <i>E. coli</i> var. <i>haemolytica</i> ; intestine: (+) <i>E. coli</i> , <i>E. coli</i> var. <i>haemolytica</i> , <i>Cl. perfringens</i> ; lung: + <i>Corynebacterium</i> spp., (+) $\alpha$ -haemolytic streptococci, <i>Bisgaardia hudsonensis</i> ; mesenteric lymphnode: (+) <i>E. coli</i> ; Uterus: (+) <i>Pseudomonas</i> spp., <i>Moraxella</i> spp.; rectal swab: ++ <i>E. coli</i> , <i>Cl. perfringens</i> , + <i>E. coli</i> var. <i>haem.</i> ; vaginal swab: +++ <i>Pseudomonas</i> spp., + <i>E. coli</i> , <i>E. coli</i> var. <i>haem.</i> |
| 233 | Ph | yes | 07.06.2019 | no | moderate infection with acanthocephalan; mild emphysema of the lung; mild follicular hyperplasia of the spleen                                                                               | small intestine: moderate acanthocephalan; large intestine: mild acanthocephalan | kidney, lung, pulmonal lymphnode: (+) <i>Pseudomonas</i> spp.; liver: (+) <i>E. coli</i> ; spleen: (+) <i>Staph. equorum</i> ; intestine: + <i>Cl. perfringens</i> , (+) <i>Pseudomonas</i> spp., aerobic <i>bacillus</i> spp.; uterus: + <i>E. coli</i> var. <i>haem.</i> , (+) <i>Pseudomonas</i> spp., $\alpha$ -haemolytic streptococci; rectal swab: +++ <i>Hafnia alvei</i> , <i>E. coli</i> var. <i>haem.</i> , (+) <i>Cl. perfringens</i> ; vaginal swab: +++ <i>Hafnia alvei</i> , <i>Pseudomonas</i> spp., ++ yeasts, + <i>Pantoea</i> spp., <i>Cl. perfringens</i>                    |
| 234 | Ph | yes | 07.06.2019 | no | moderate body condition; moderate infection with acanthocephalan; moderate, chronic cholecystitis; moderate fibrosis of the left atrioventricular valve                                      | small intestine: mild acanthocephalan; colon: moderate acanthocephalan           | lung: (+) Pasteurellaceae; CNS: (+) $\alpha$ -haemolytic streptococci, <i>Pseudomonas</i> spp.; <i>Psychrobacter</i> spp.; rectal swab +++ <i>E. coli</i> var. <i>haem.</i> , <i>Pseudomonas</i> spp., (+) <i>Aeromonas</i> spp.                                                                                                                                                                                                                                                                                                                                                                 |
| 235 | Ph | no  | 08.06.2019 | no | moderate infection with acanthocephalan; mild, focal atelectasis of the lung                                                                                                                 | small intestine: mild acanthocephalan; colon: moderate acanthocephalan           | lung: + <i>Neisseria</i> sp., (+) <i>Sc. dysgalactiae</i> spp. <i>equisimilis</i> ; pulmonal lymphnode: (+) <i>Neisseria</i> sp., <i>E. coli</i> var. <i>haem.</i> ; intestine: <i>Cl. perfringens</i> ; CNS: + <i>Neisseria</i> spp., <i>Corynebacterium</i> spp., <i>E. coli</i> var. <i>haem.</i> ; uterus: (+) <i>E. coli</i> var. <i>haem.</i> ; rectal swab: +++ <i>Pantoea</i> spp., <i>Shewanella</i> spp., <i>Pseudomonas</i> spp., (+) yeasts; vaginal swab: + <i>Staphylococcus</i> spp                                                                                               |

Table S3: Necropsy findings. The table lists all necropsied marine mammals, their sample IDs, the species (Pv = *Phoca vitulina* (harbour seal), Hg = *Halichoerus grypus* (grey seal), Ph = *Phusa hispida*, Pp = *Phocoena phocoena* (harbour porpoise)), if antimicrobial-resistant *E. coli* were isolated from the sample, date of necropsy, freezing prior to necropsy, main macroscopic findings, parasitic burdens, and results of microbiology testing of tissues.
