# Supplementary material for: Occurrence of Antimicrobial-Resistant Escherichia coli in Marine Mammals of the North and Baltic Seas: Sentinels for Human Health
Source: MDPI journal article supplement (doi:10.3390/antibiotics11091248), 2022-09-14
Supplement: s1 [file s1]

## Supplementary Figures

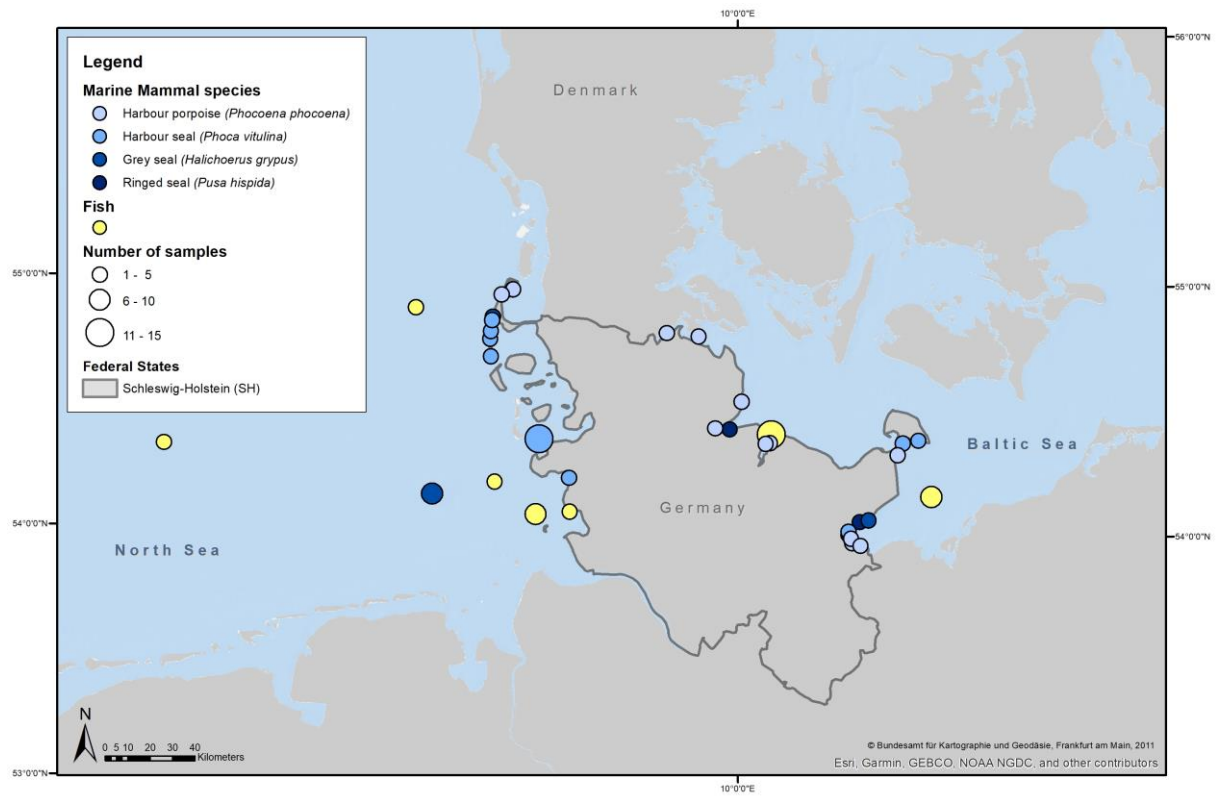

Figure S1: The map depicts the samples of fishes and marine mammals from the North and Baltic Sea coasts of Schleswig-Holstein, Germany.

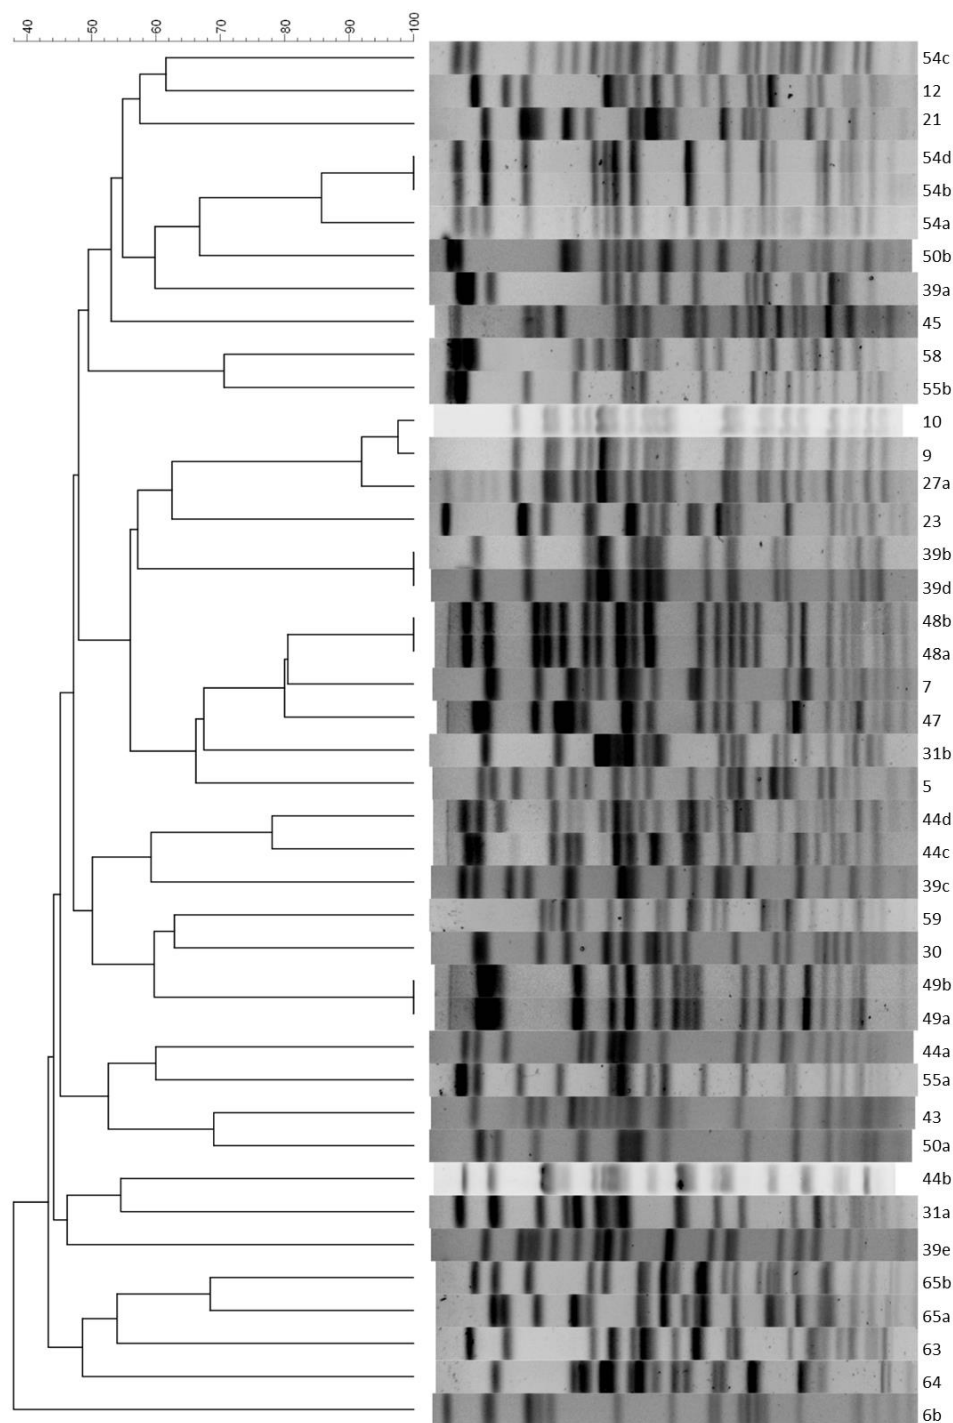

Figure S2: The figure shows the dendrogram including the pulsed-field gel electrophoresis band patterns of the 42 isolates that were typeable by XbaI macrorestriction.
