# Supplementary material for: Occurrence of Antimicrobial-Resistant Escherichia coli in Marine Mammals of the North and Baltic Seas: Sentinels for Human Health
Source: Antibiotics (Basel). 2022 Sep 14;11(9):1248. doi: 10.3390/antibiotics11091248 (PMC9495373; doi:10.3390/antibiotics11091248)
Supplement: Supplementary file 1 [file antibiotics-11-01248-s001.zip]

Archive with 6 entries (6 files):
- Figures - suplementary material.pdf
- Table S1_with change.pdf
- Table S2.pdf
- Table S3.pdf
- Table S4.pdf
- Table S5_with change.pdf
